# Supplementary material for: New Tricholidic Acid Triterpenoids from the Mushroom Tricholoma ustaloides Collected in an Italian Beech Wood
Source: MDPI journal article supplement (doi:10.3390/molecules28093864), 2023-05-04
Supplement: s1 [file s1]

## SUPPLEMENTARY MATERIALS

### New tricholidic acid triterpenoids from the mushroom *Tricholoma ustaloides* collected in an Italian beech wood

Gianluca Gilardoni<sup>1</sup>, Francesca Negri<sup>2</sup>, Paola Vita Finzi<sup>2</sup>, Faiq H. S. Hussain<sup>3</sup>, Giovanni Vidari<sup>2,3,\*</sup>

<sup>1</sup> Departamento de Química, Universidad Técnica Particular de Loja (UTPL), 1101608 Loja, Ecuador

<sup>2</sup> Dipartimento di Chimica, Università degli Studi di Pavia, Via Taramelli 10, 27100 Pavia, Italy

<sup>3</sup> Department of Medical Analysis, Faculty of Applied Science, Tishk International University, Erbil 44001, Kurdistan Region, Iraq

\* Correspondence: vidari@unipv.it (G.V.)

**Abstract:** The secondary metabolites produced by *Tricholoma ustaloides* Romagn., a mushroom species belonging to the large *Tricholoma* genus (Basidiomycota, Tricholomataceae), are unknown. Therefore, encouraged by the interesting results obtained in our previous chemical analyses of a few *Tricholoma* species collected in Italian woods, we were aimed to investigate the secondary metabolites of *Tricholoma ustaloides*. The chemical analysis involved the isolation and characterization of secondary metabolites through an extensive chromatographic study. The structures of isolated metabolites, including the absolute configuration, were established based on a detailed analysis of MS, NMR spectroscopic, optical rotation and circular dichroism data, and on comparison with those of related compounds reported in the literature. Two novel lanostane triterpenoids, named tricholidic acids B and C, together with triglycerides, a mixture of free fatty acids, five unidentified metabolites, and known rare saponaceolides F and J, tricholidic acid, and tricholomenyn C, were isolated from an EtOAc extract of fruiting bodies of *Tricholoma ustaloides*, that were collected in an Italian beech wood. This is the second example of isolation of tricholidic acid derivatives from a natural source. Saponaceolides F and J exhibited high cytotoxicity (IC<sub>50</sub> values ≤ 10 µM) against a panel of five human cancer cell lines. The toxicity against myeloid leukemia (HL-60), lung cancer (A-549), hepatocellular cancer (HepG2), renal cancer (Caki-1), and breast cancer (MCF-7) cells was higher than that shown by the very well-known cytotoxic drug cisplatin.

**Keywords:** *Tricholoma ustaloides*; Tricholomataceae (Basidiomycota); lanostane triterpenoids; tricholidic acid derivatives; saponaceolides; tricholomenyn; cytotoxicity.

|                                                       |           |
|-------------------------------------------------------|-----------|
| <sup>1</sup> H NMR spectrum of saponaceolide J (1)    | S1A + S1B |
| <sup>13</sup> C NMR spectrum of saponaceolide J (1)   | S2A + S2B |
| <sup>1</sup> H NMR spectrum of saponaceolide F (2)    | S3        |
| <sup>13</sup> C NMR spectrum of saponaceolide F (2)   | S4        |
| <sup>1</sup> H NMR spectrum of tricholidic acid (5)   | S5        |
| COSY spectrum of tricholidic acid (5)                 | S6        |
| <sup>13</sup> C NMR spectrum of tricholidic acid (5)  | S7        |
| DEPT (135°) of tricholidic acid (5)                   | S8A + S8B |
| <sup>1</sup> H NMR spectrum of tricholidic acid B (6) | S9        |

|                                                                |             |
|----------------------------------------------------------------|-------------|
| COSY spectrum of tricholodic acid B (6)                        | S10         |
| <sup>1</sup> H NMR spectrum of tricholidic acid B methyl ester | S11A + S11B |
| <sup>13</sup> C NMR spectrum of tricholidic acid B (6)         | S12A + S12B |
| DEPT (135°) of tricholoidic acid B (6)                         | S13         |
| HSQC spectrum of tricholidic acid B (6)                        | S14A – S14D |
| <sup>1</sup> H NMR spectrum of tricholidic acid C (7)          | S15         |
| COSY spectrum of tricholidic acid C (7)                        | S16A + S16B |
| <sup>13</sup> C NMR spectrum of tricholidic acid C (7)         | S17         |
| DEPT (135°) of tricholoidic acid C (7)                         | S18A – S18C |
| HSQC spectrum of tricholidic acid C (7)                        | S19A – S19C |

CDCL<sub>3</sub>

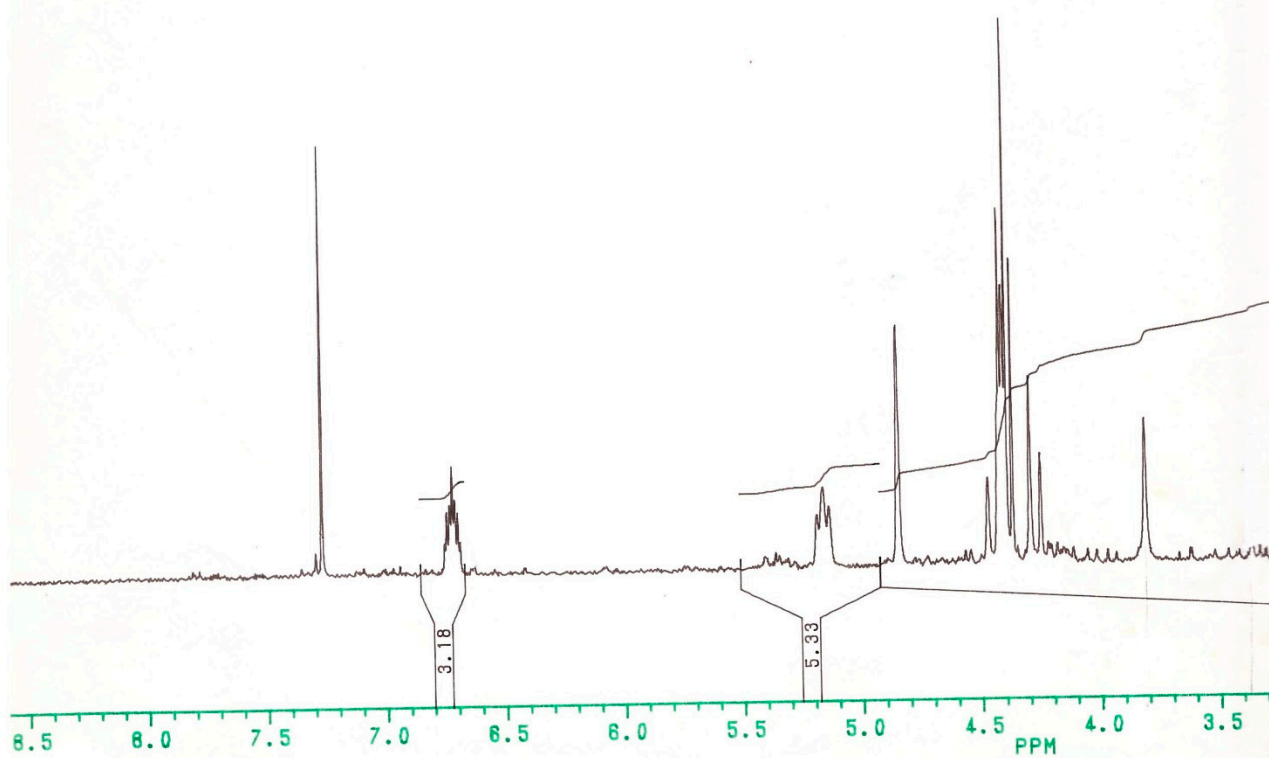

S1A

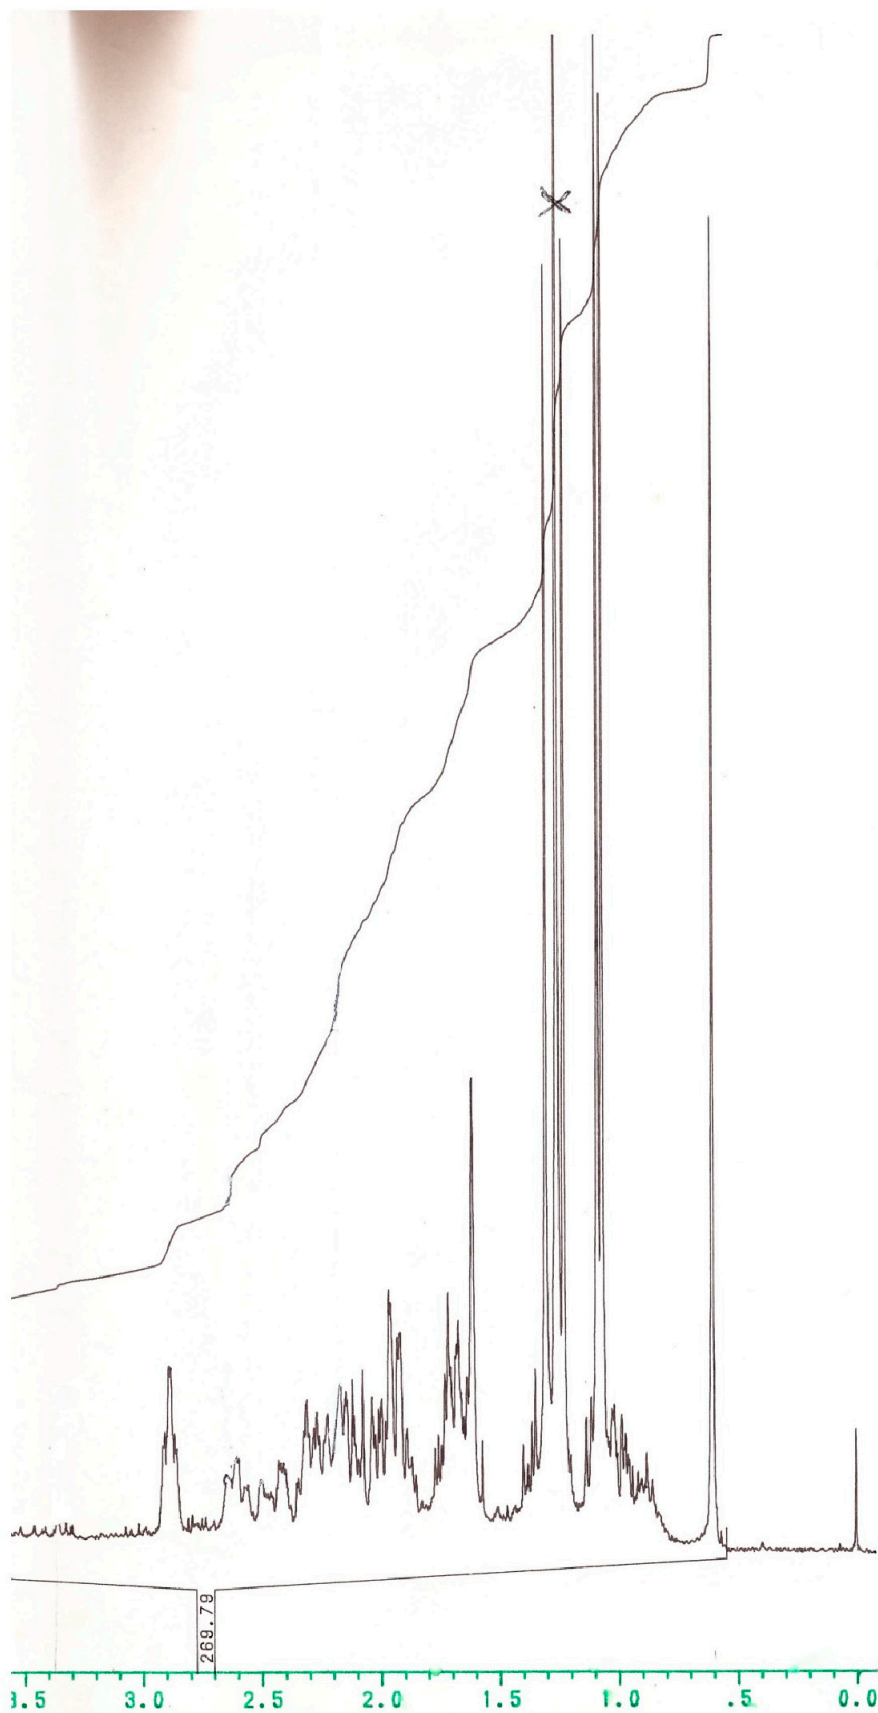

BRUKER  
VIDA.003  
DATE 2-2-95  
SF 300.133  
SY 210.0  
O1 4900.000  
SI 32768  
TD 16384  
SW 4000.000  
HZ/PT .244  
PW 6.0  
RD 2.000  
AQ 2.048  
RG 20  
NS 32  
TE 305  
FW 5000  
O2 15000.000  
DP 63L P0  
LB .200  
GB 0.0  
CX 35.00  
CY 0.0  
F1 2600.10H  
F2 -24.90H  
HZ/CM 75.000  
PPM/CM .250  
SR 3365.33

S1B

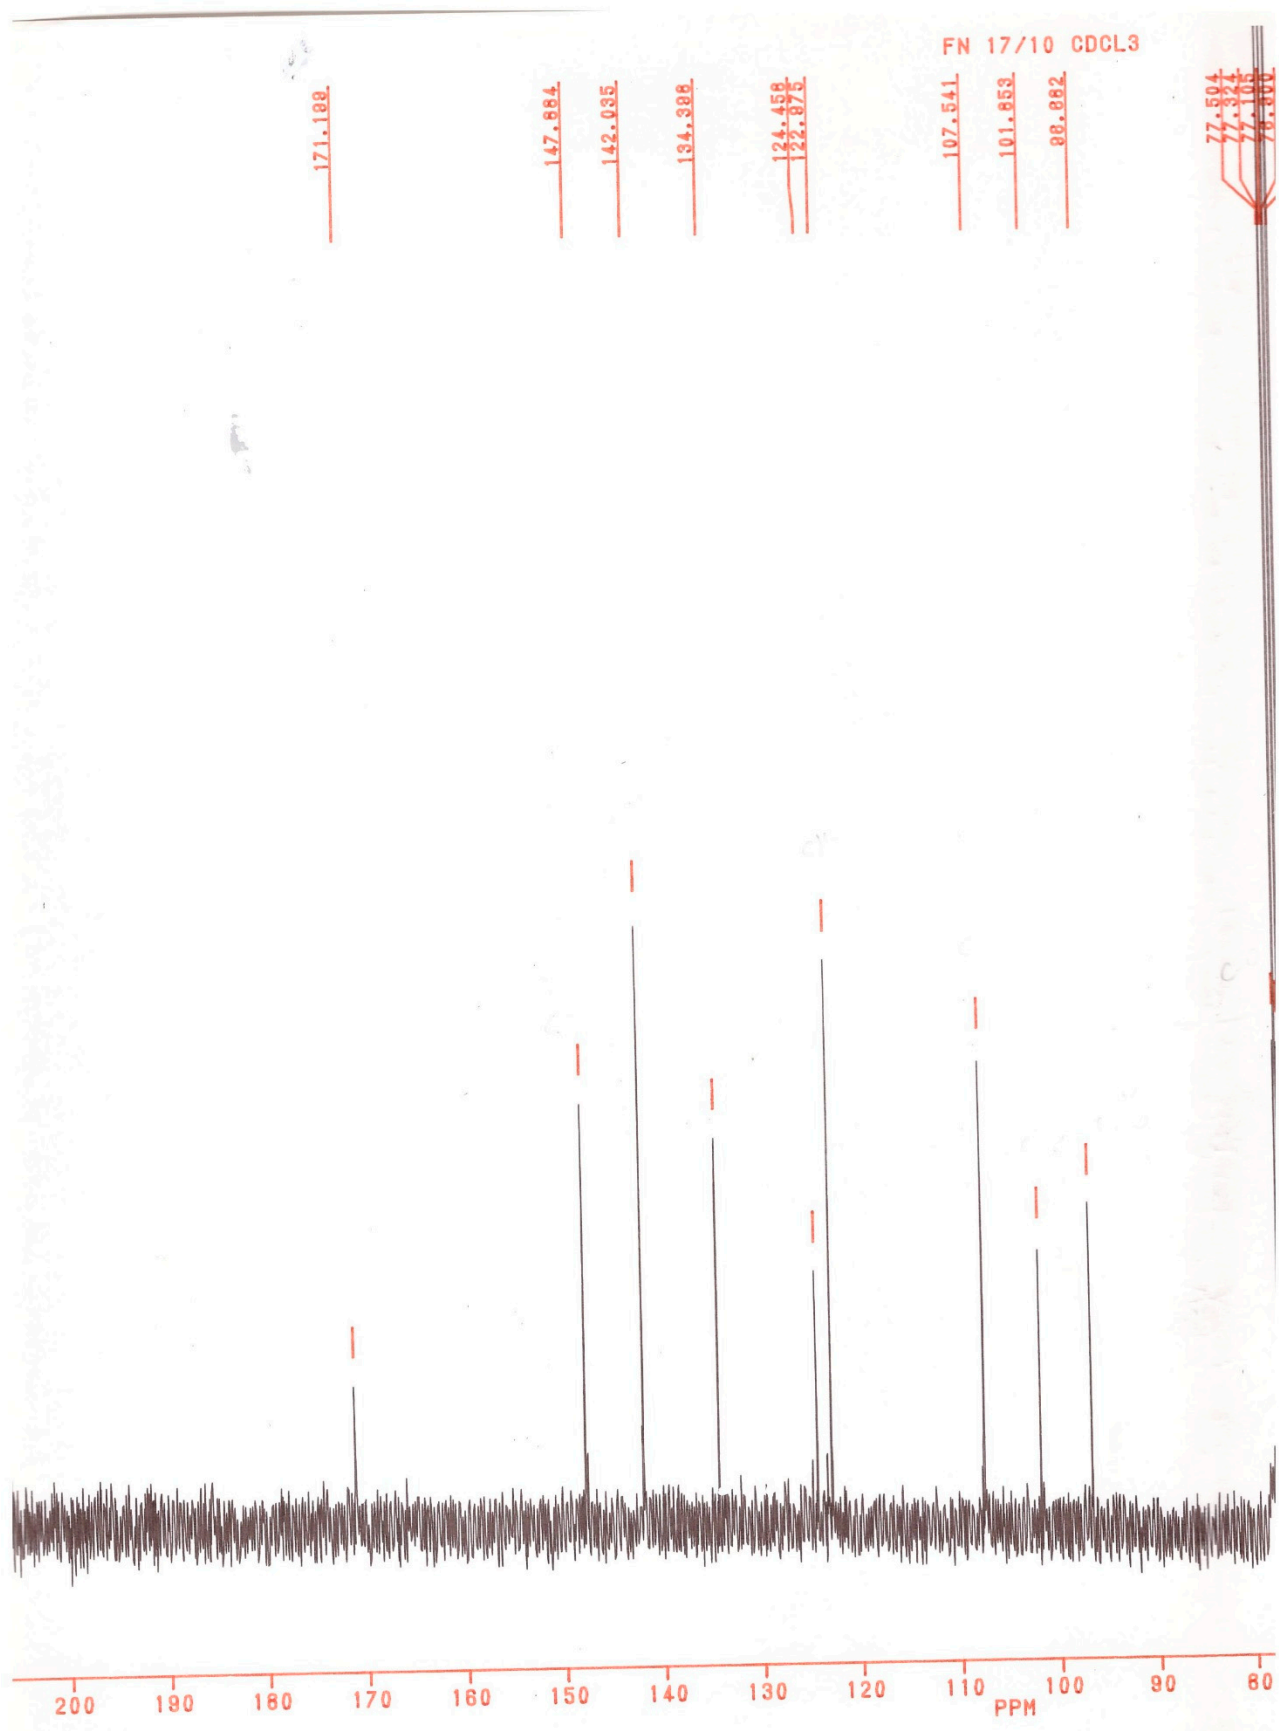

S2A



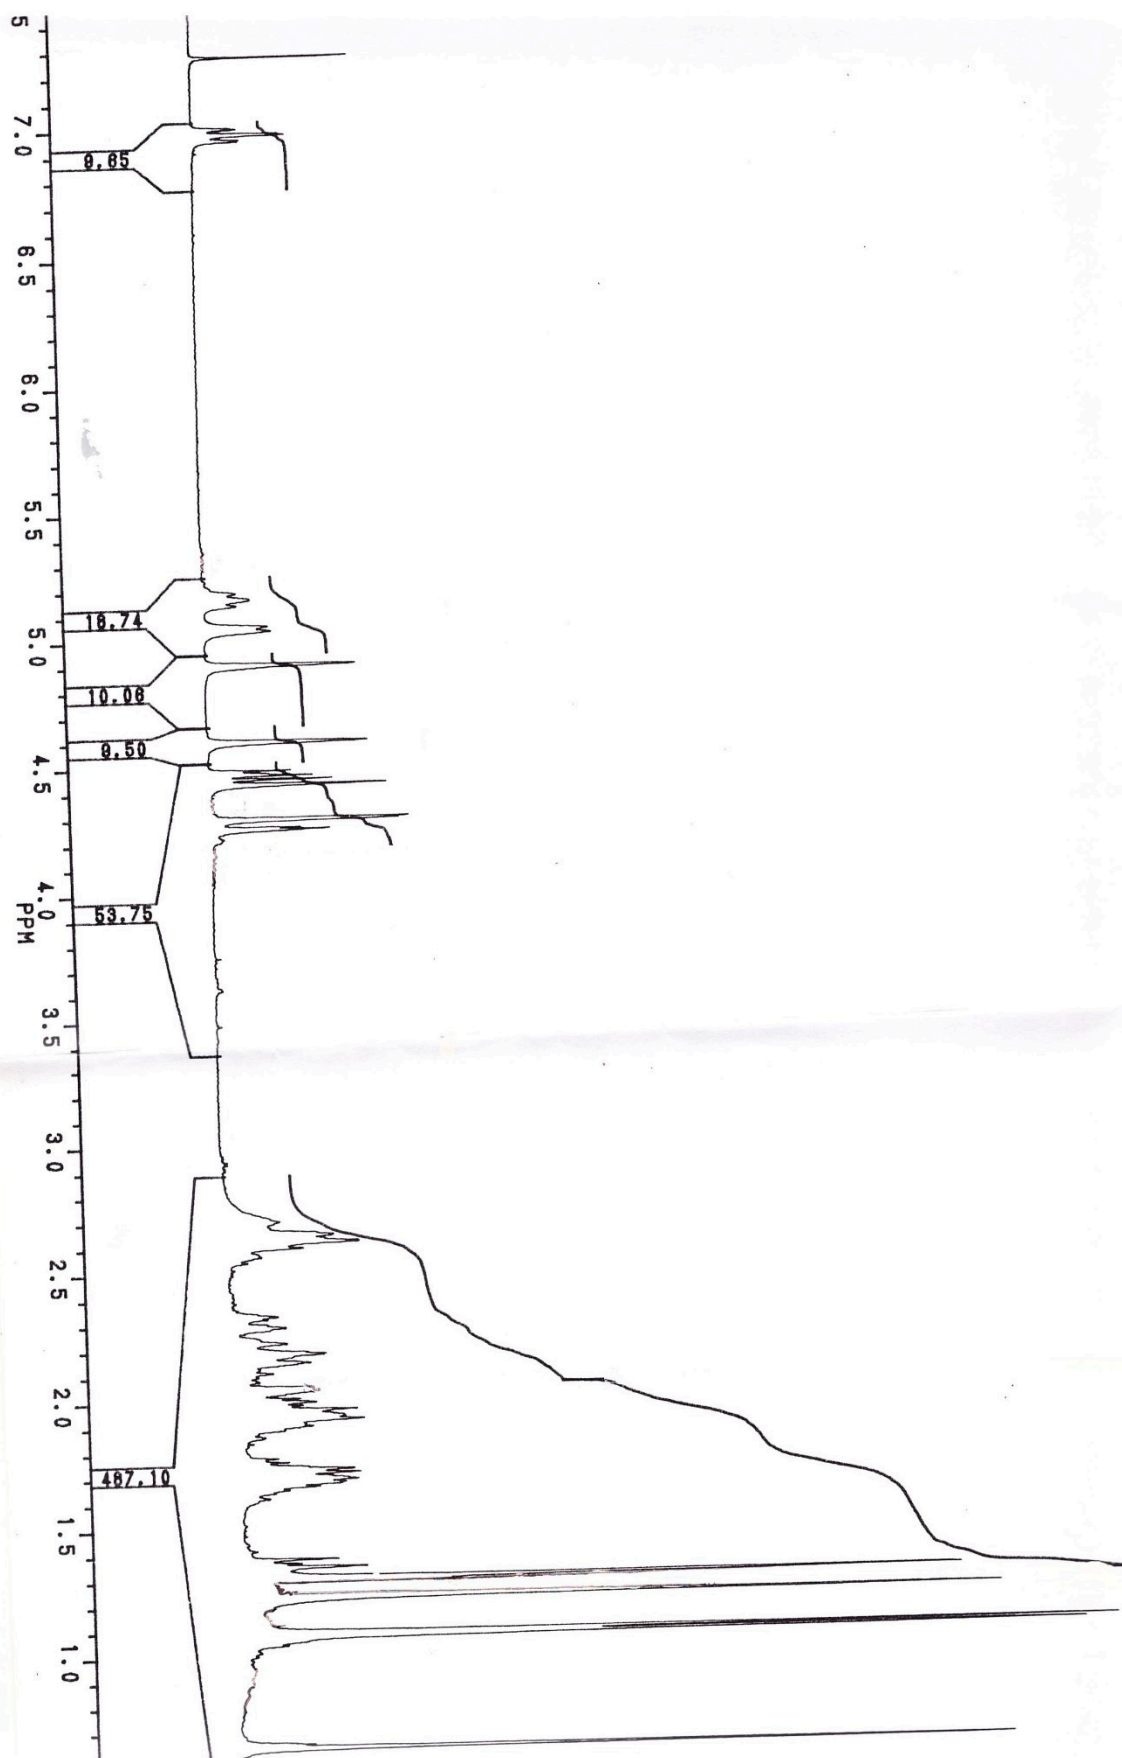

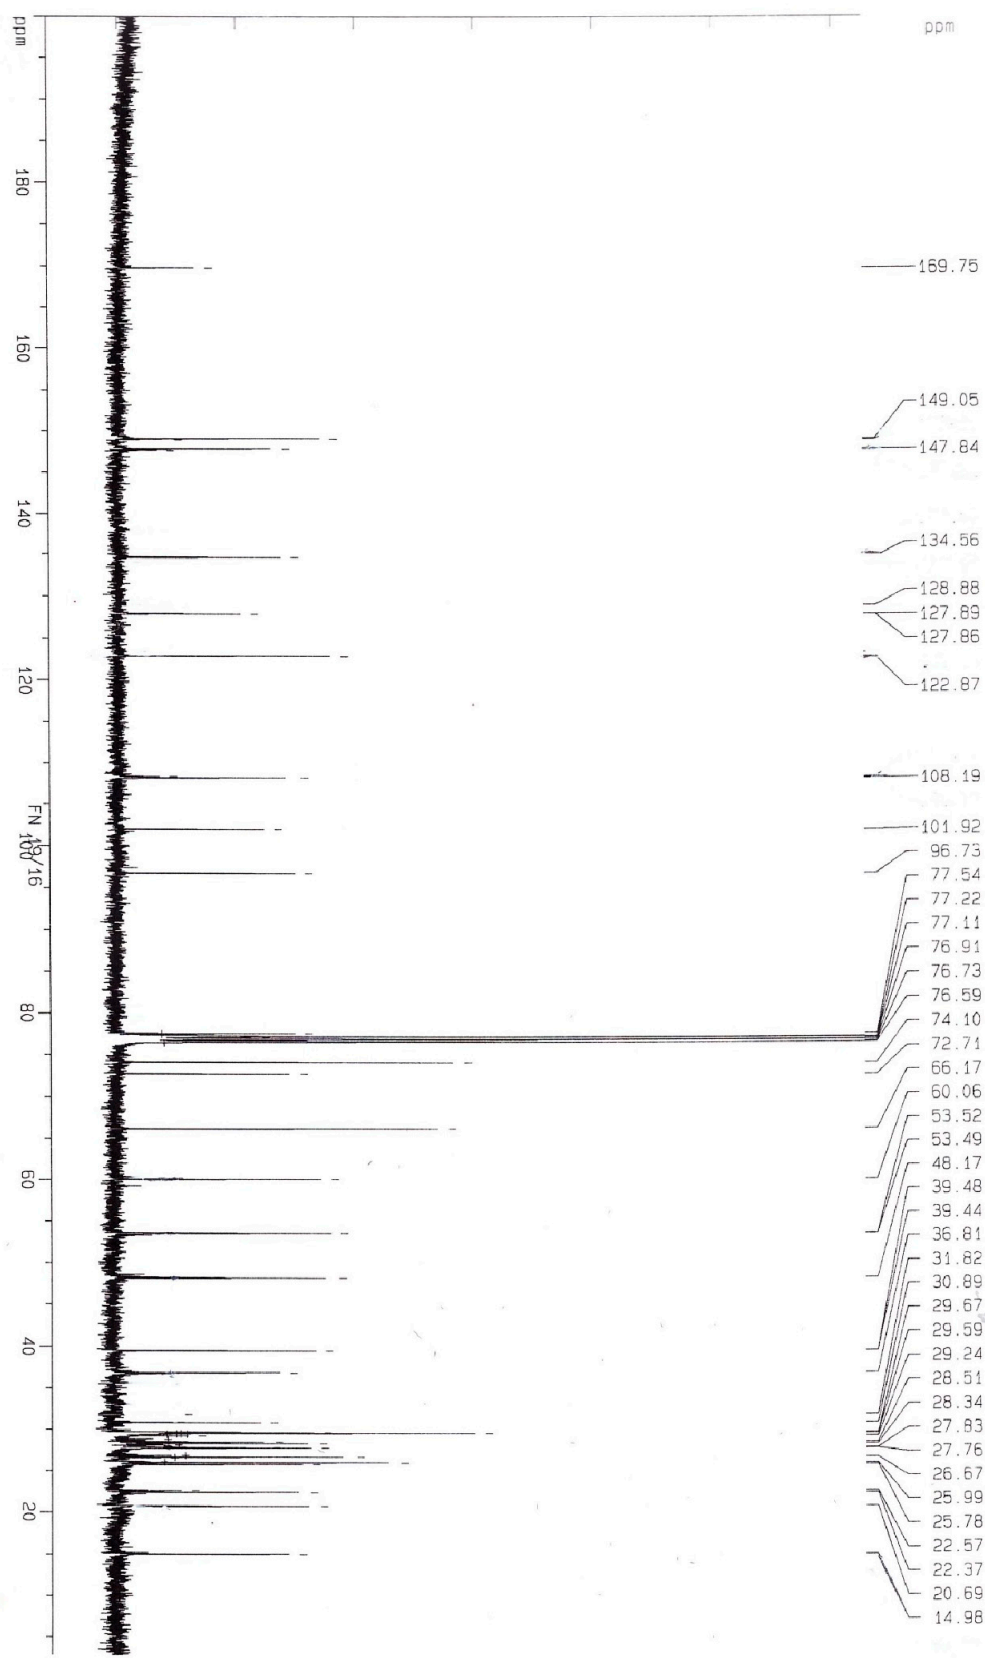



FN 22/10 GDCL3

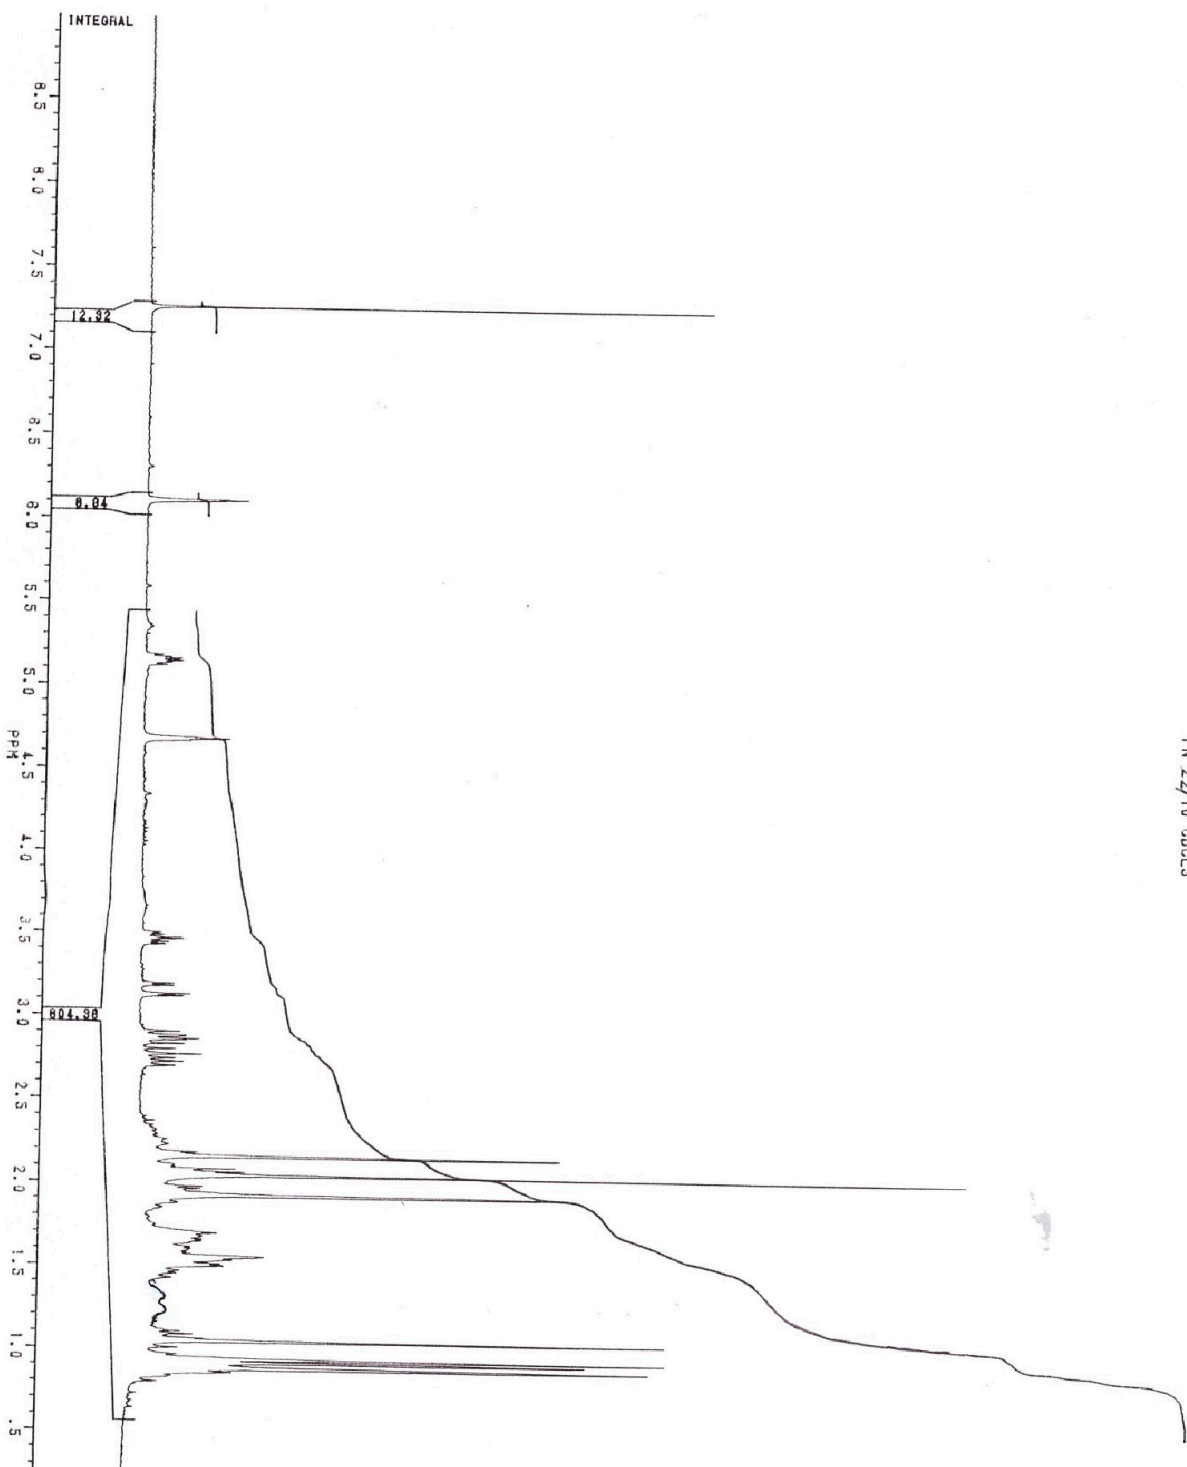

EX-101  
 DATE 24-9-01  
 SF 300  
 SY 210  
 O1 4700  
 S1 32728  
 TD 16284  
 SM 3401  
 HZ/PT  
 PM 6  
 RD 2  
 AD 2  
 RG 20  
 NS 57  
 TE 305  
 FM 4300  
 O2 16000  
 DP 63L PO  
 LB 0  
 CB 35  
 CY 0  
 F1 2700  
 F2 75  
 HZ/CH 74  
 PM/CH 3388  
 SR 3388

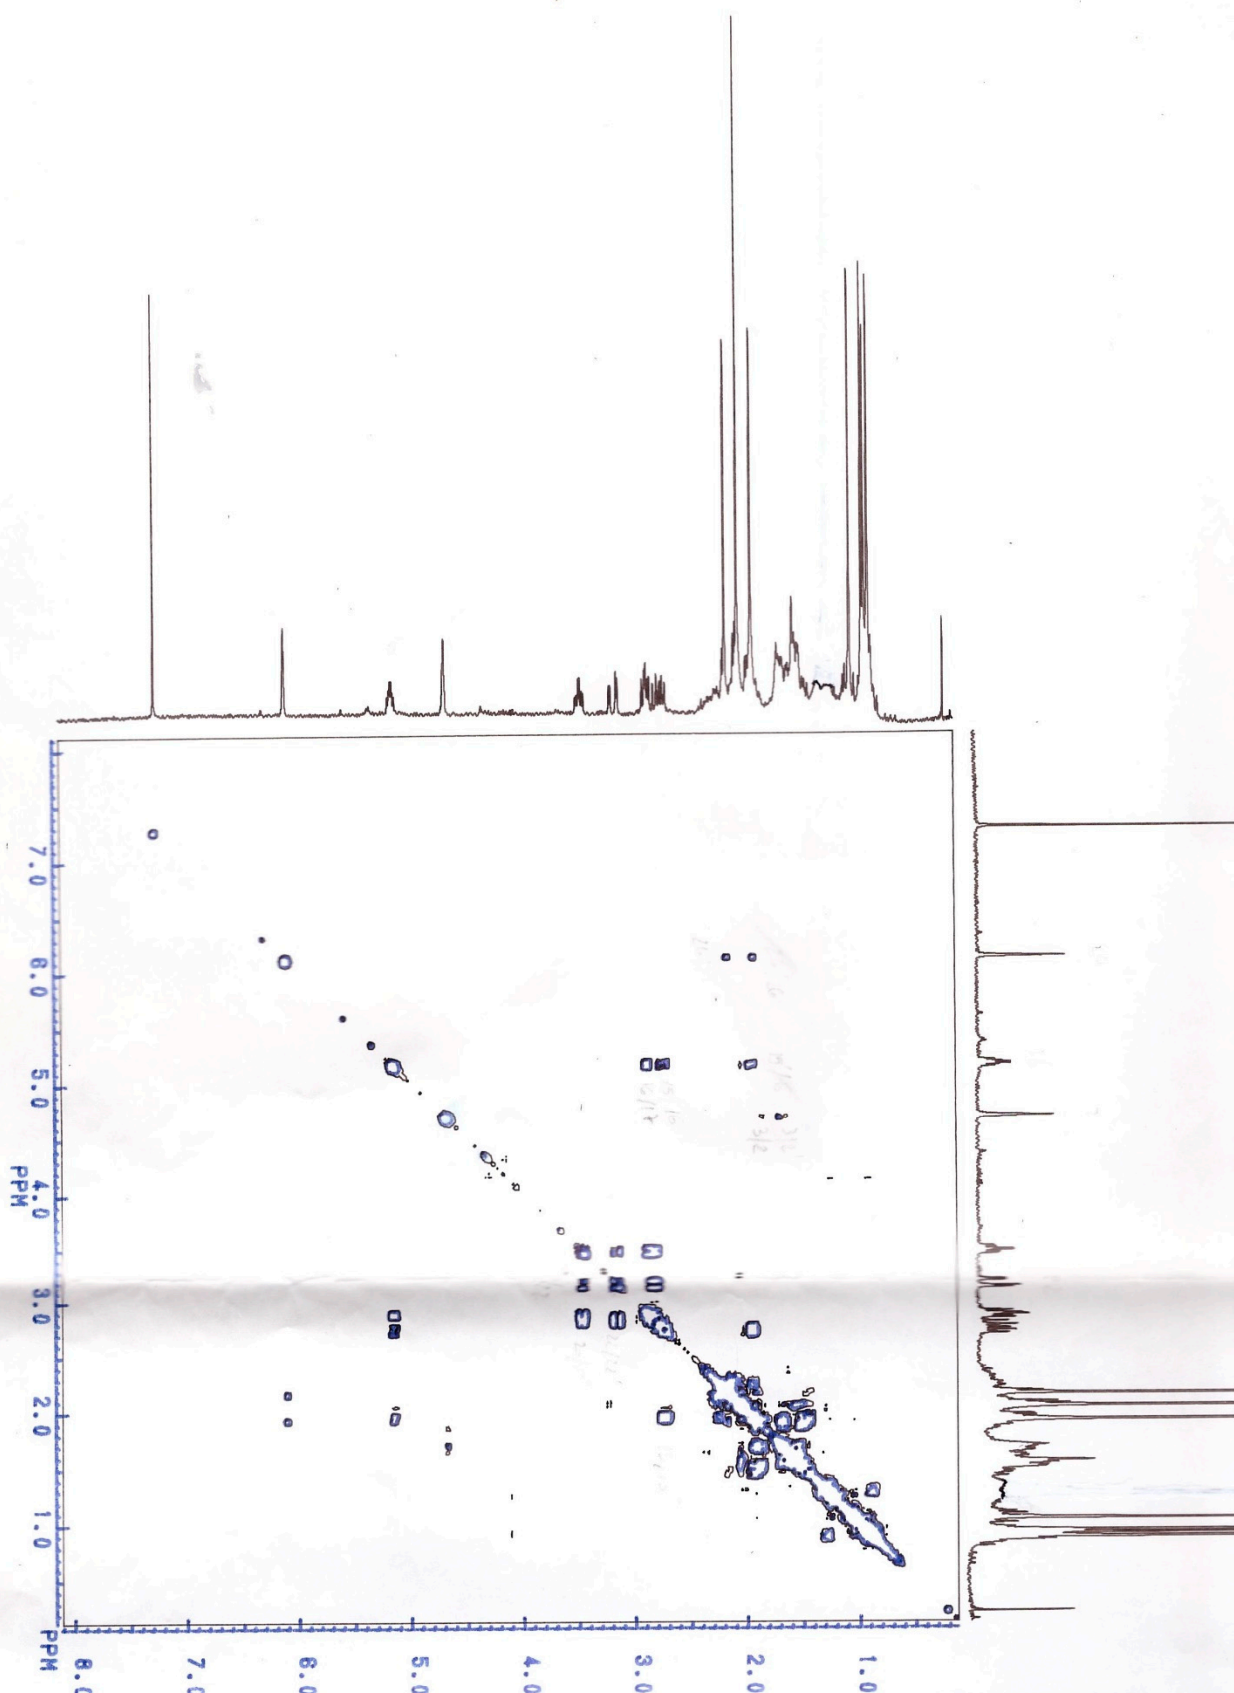

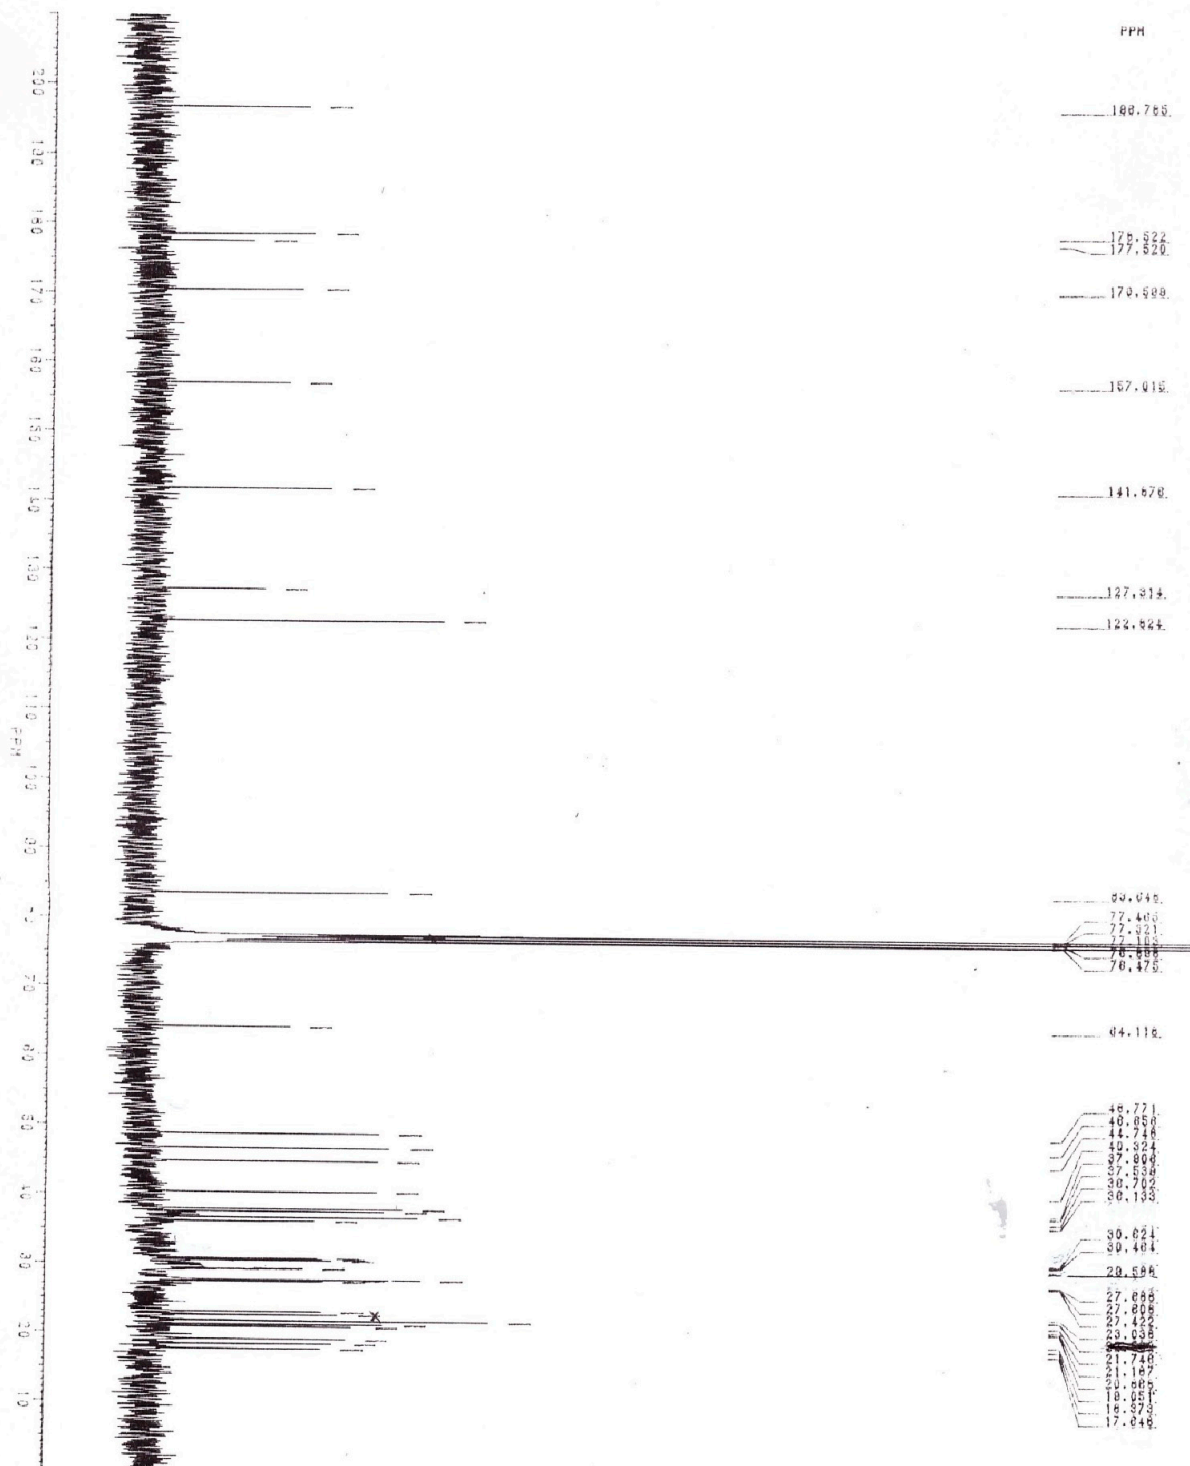

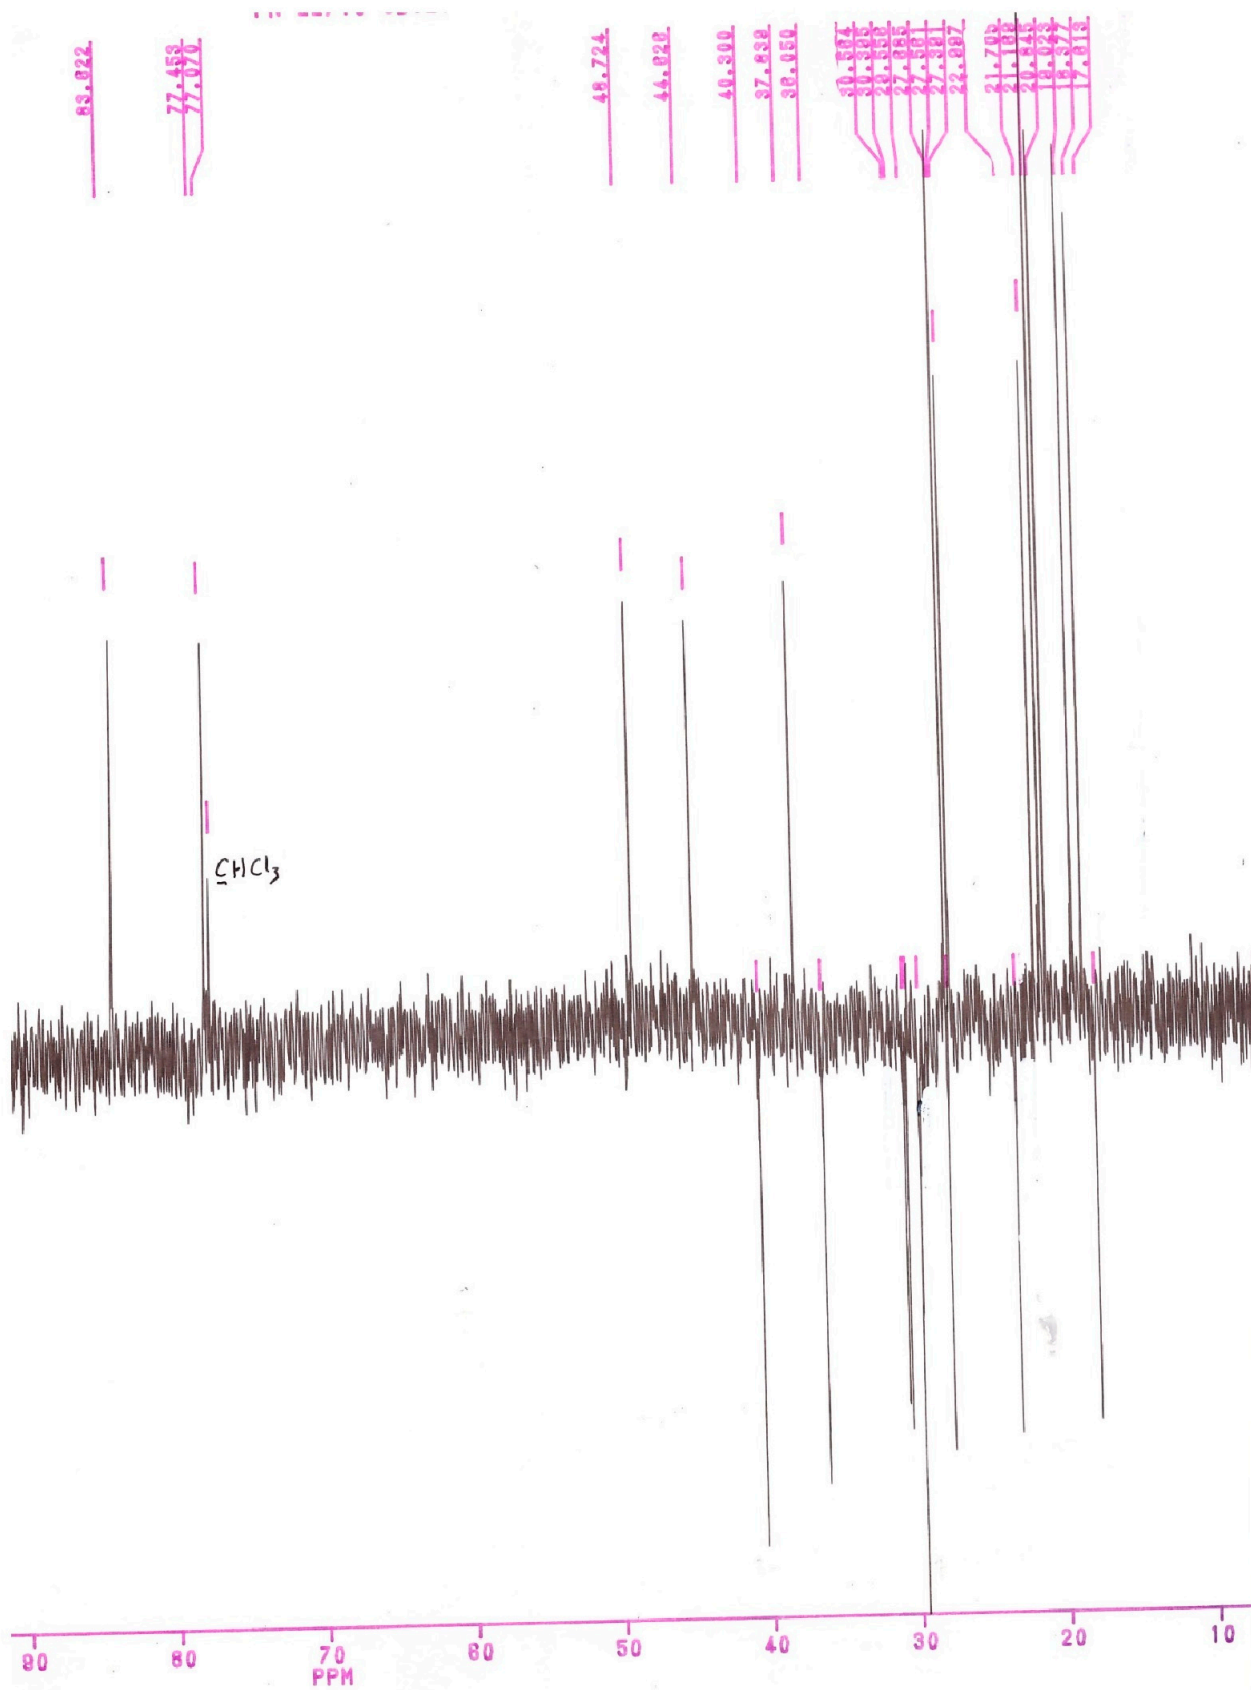

S8A

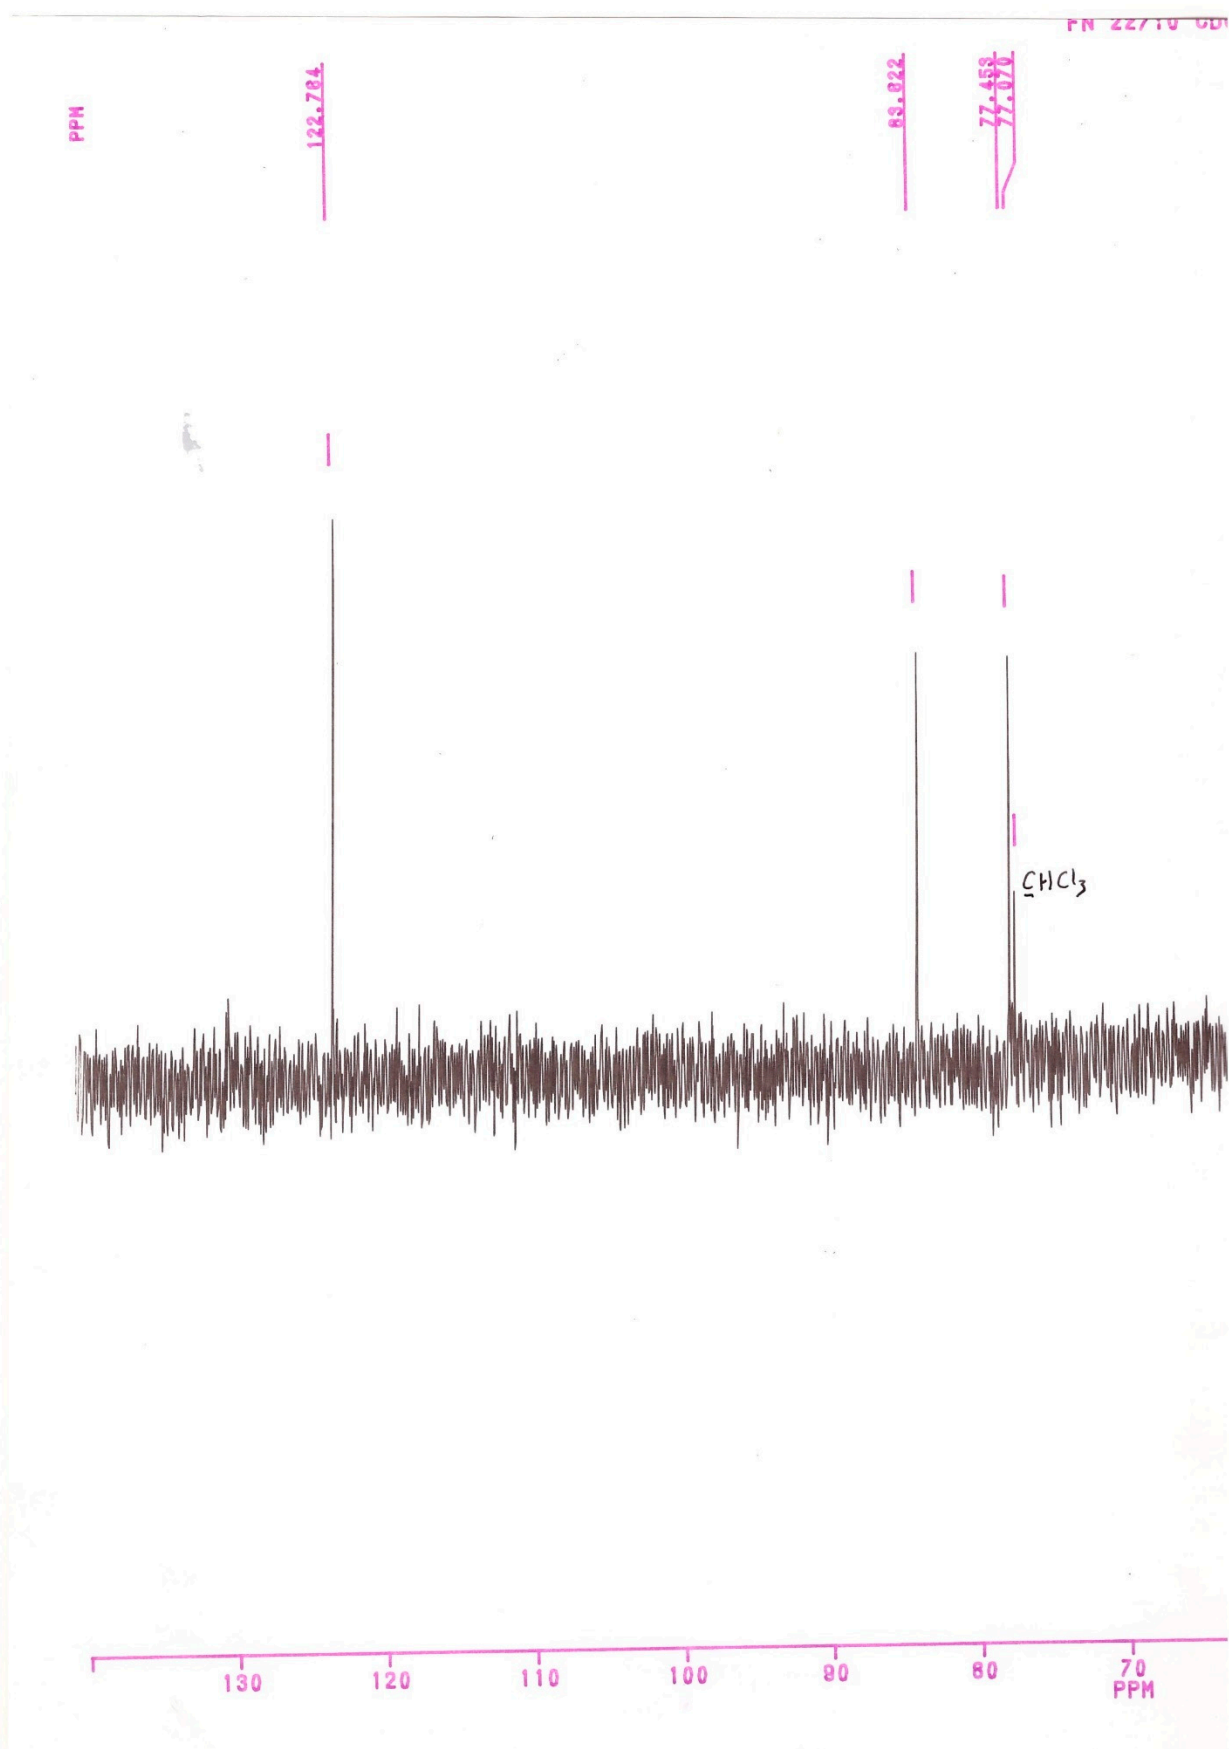

S8B

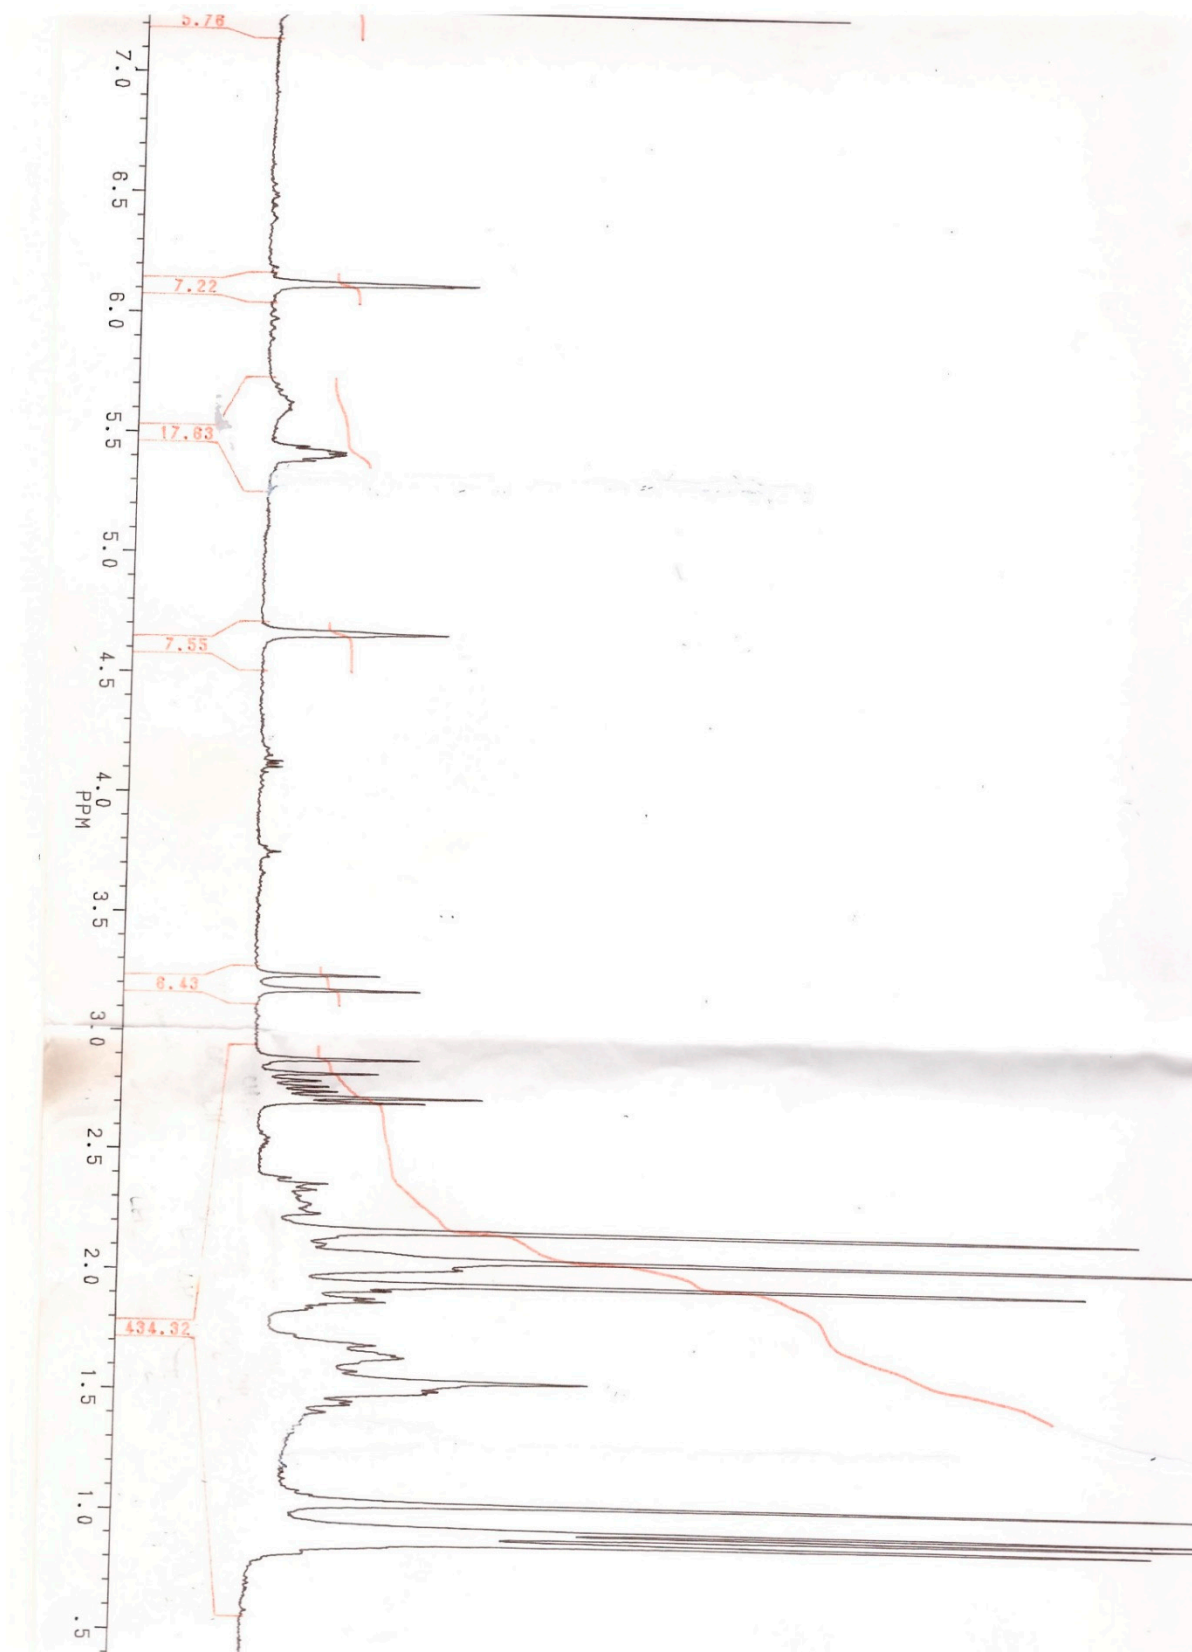

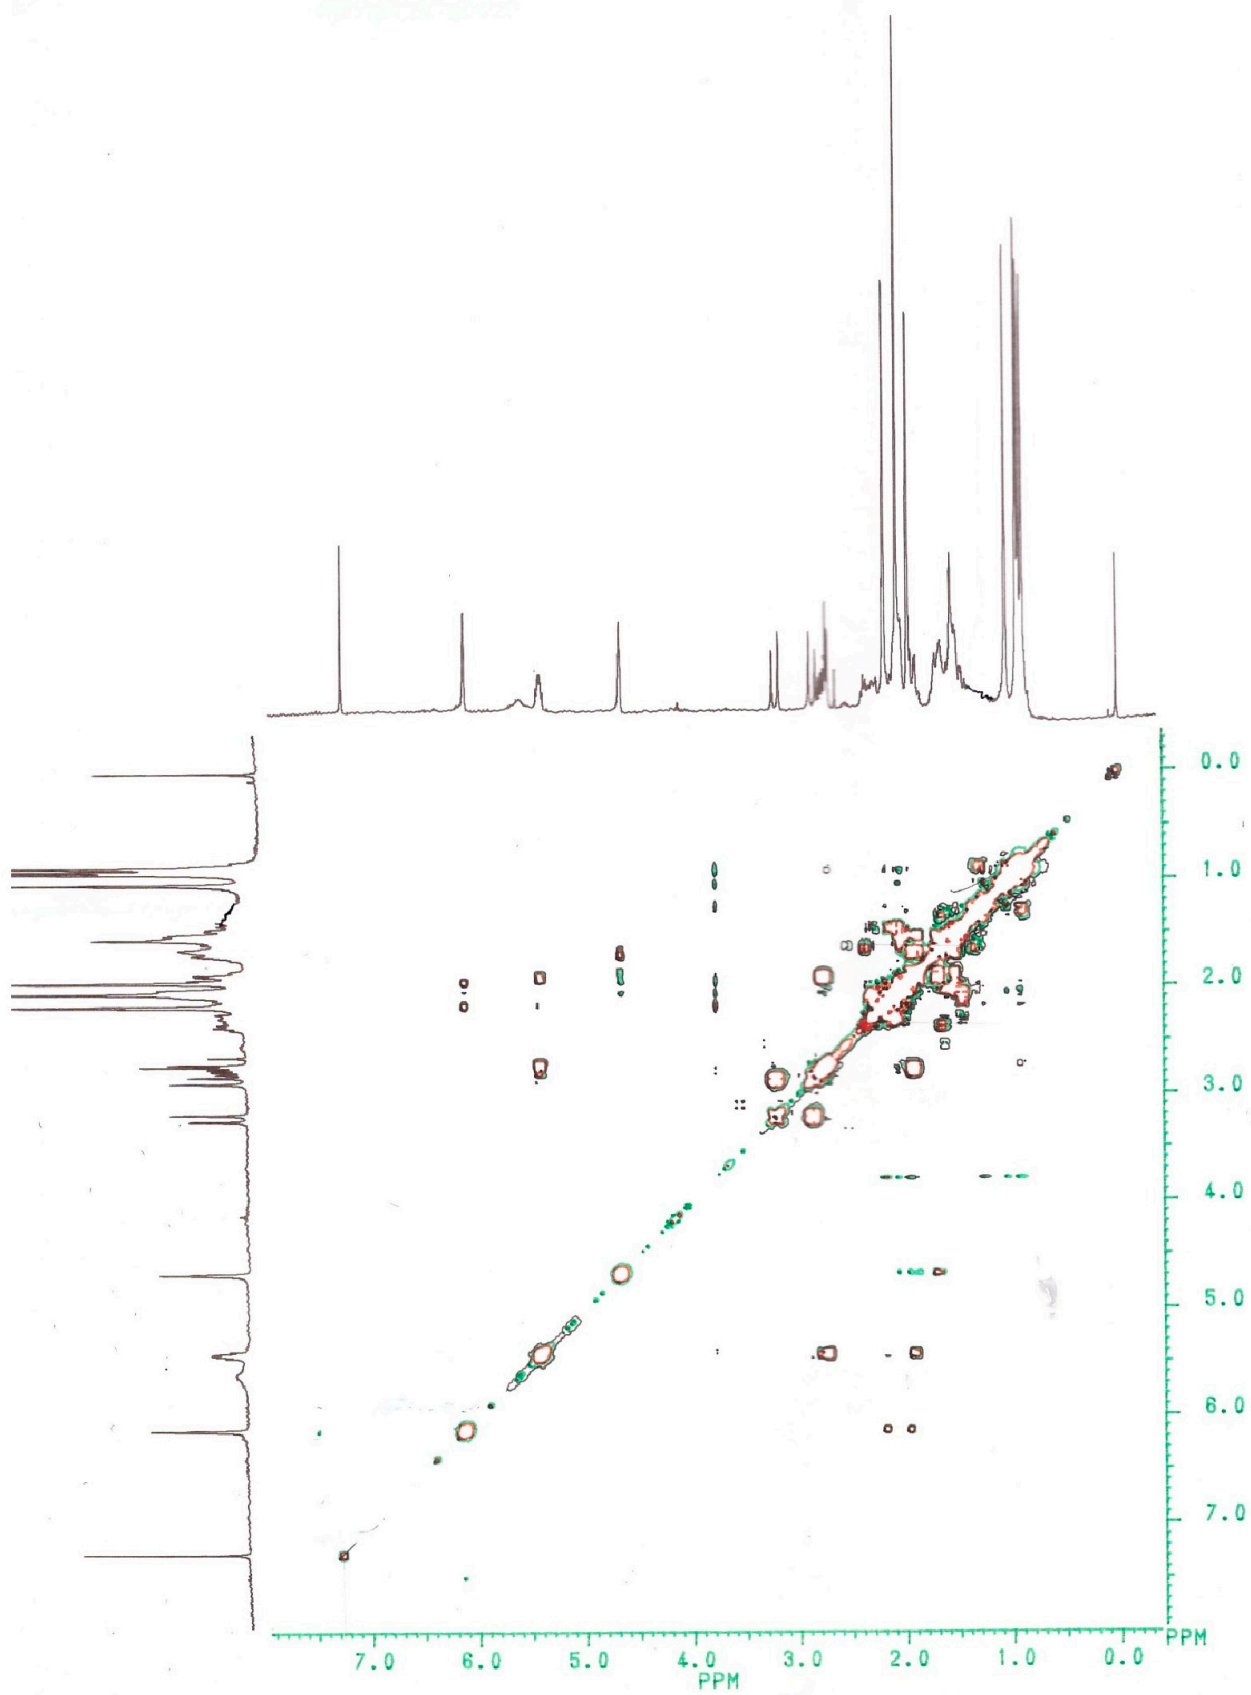

S10



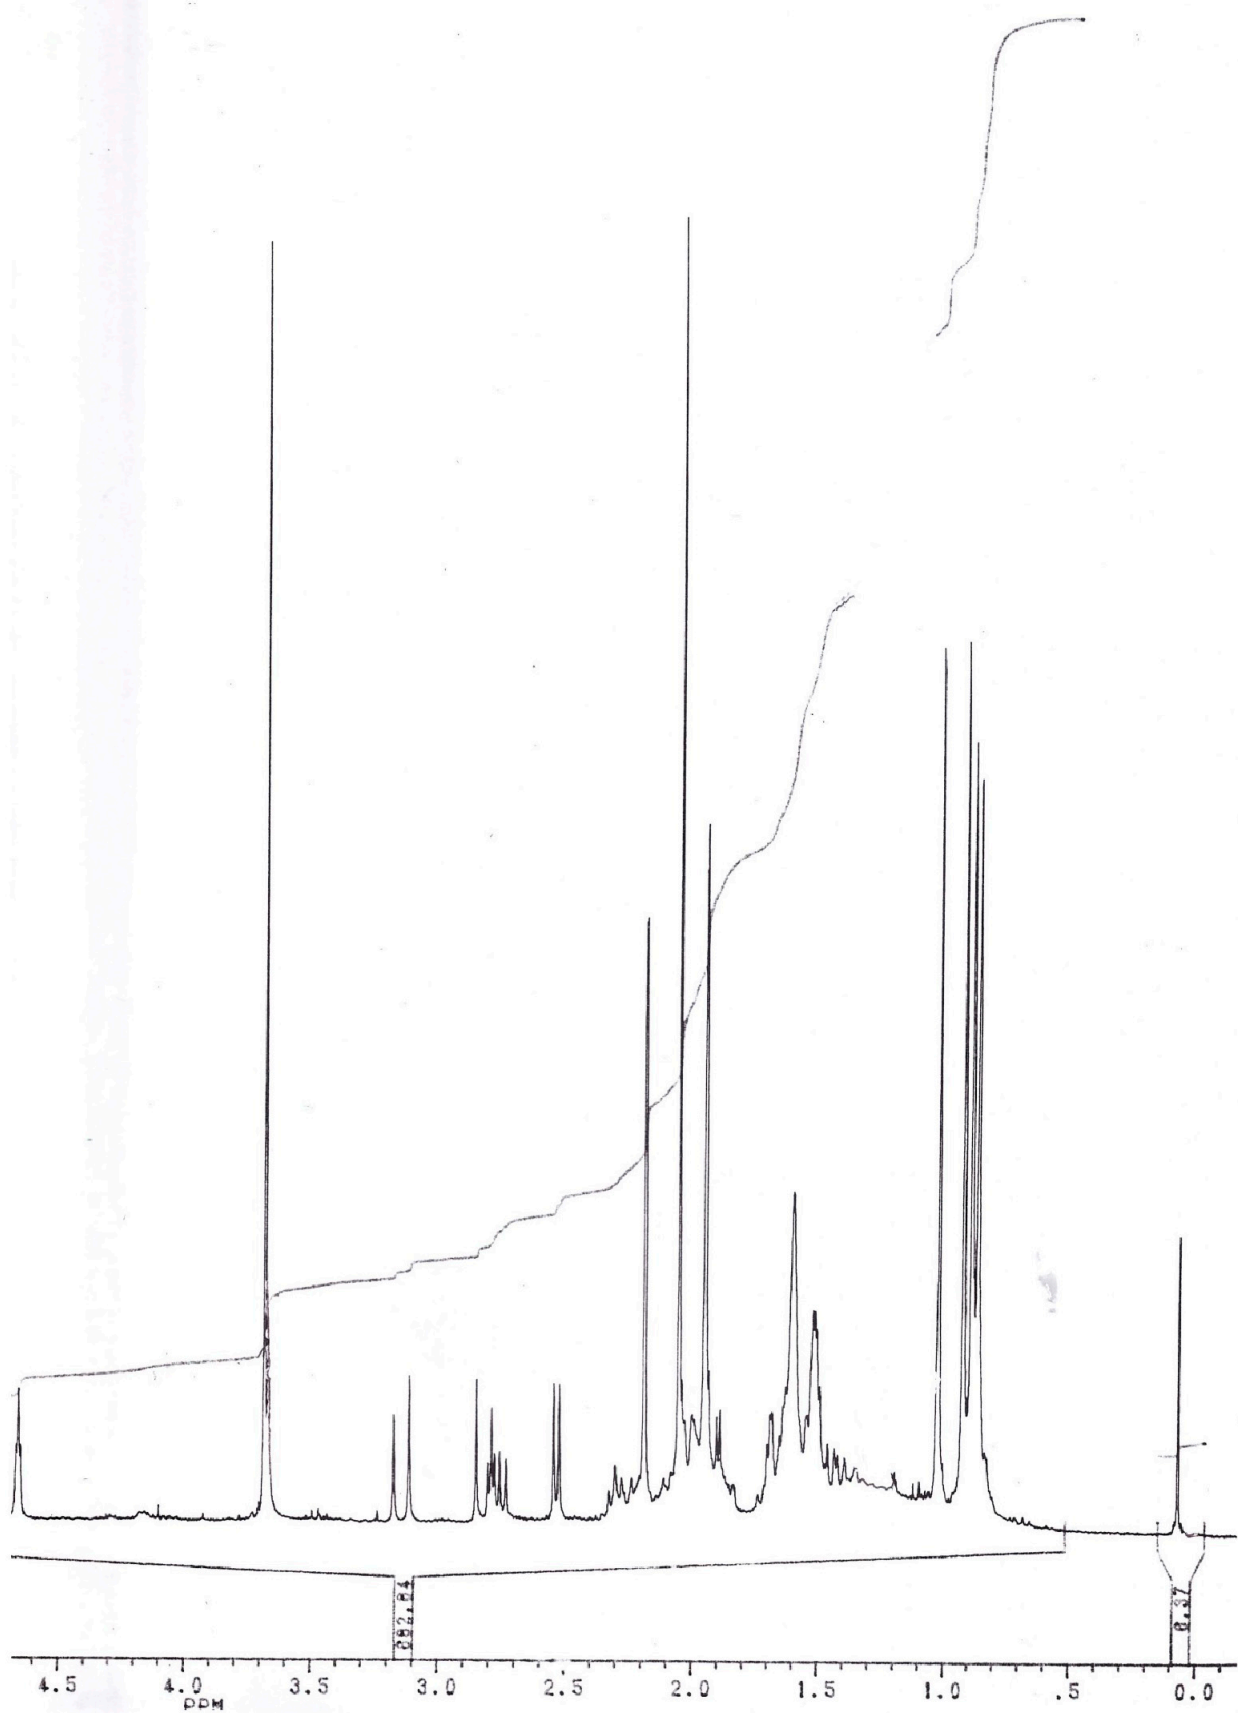



S11A

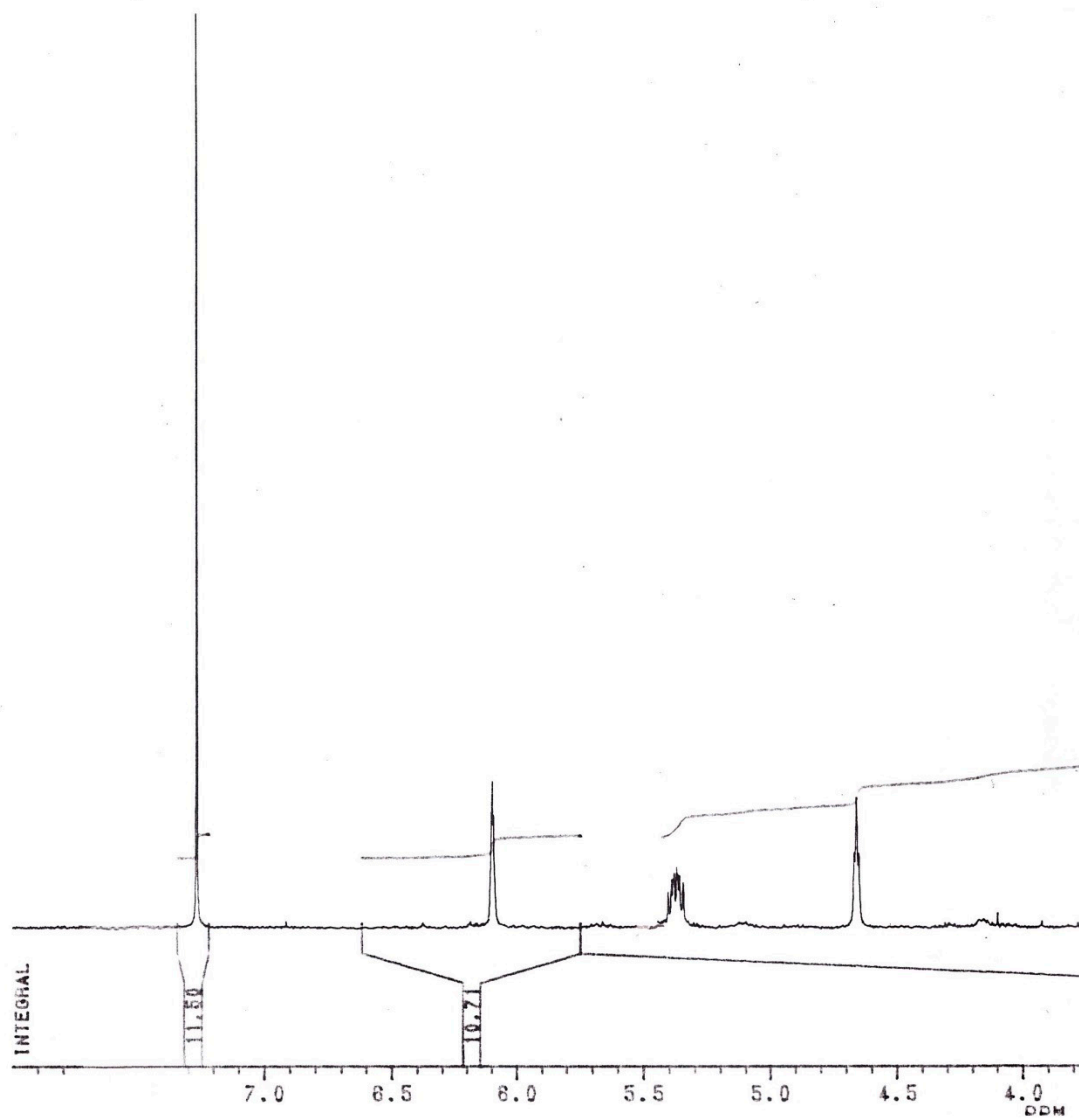

S11B

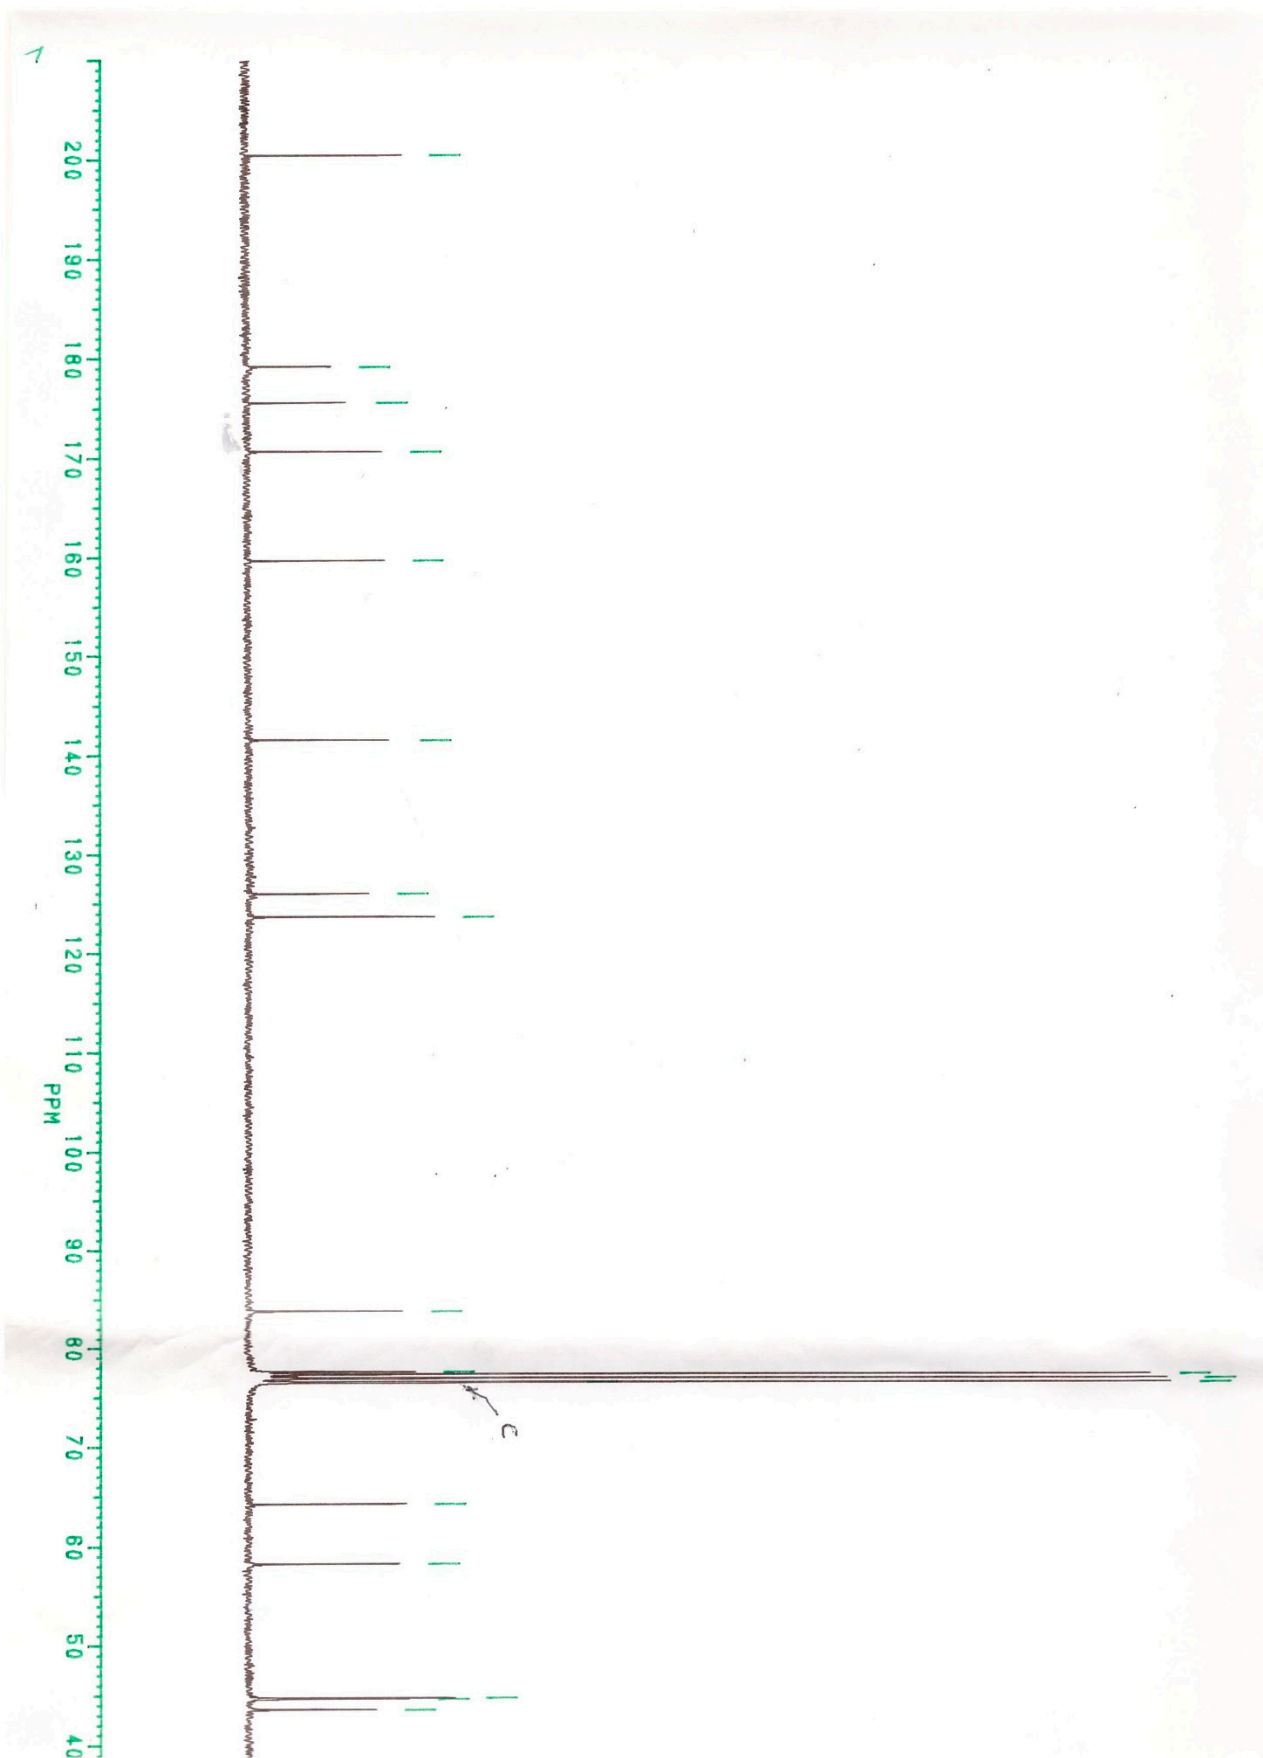

S12A

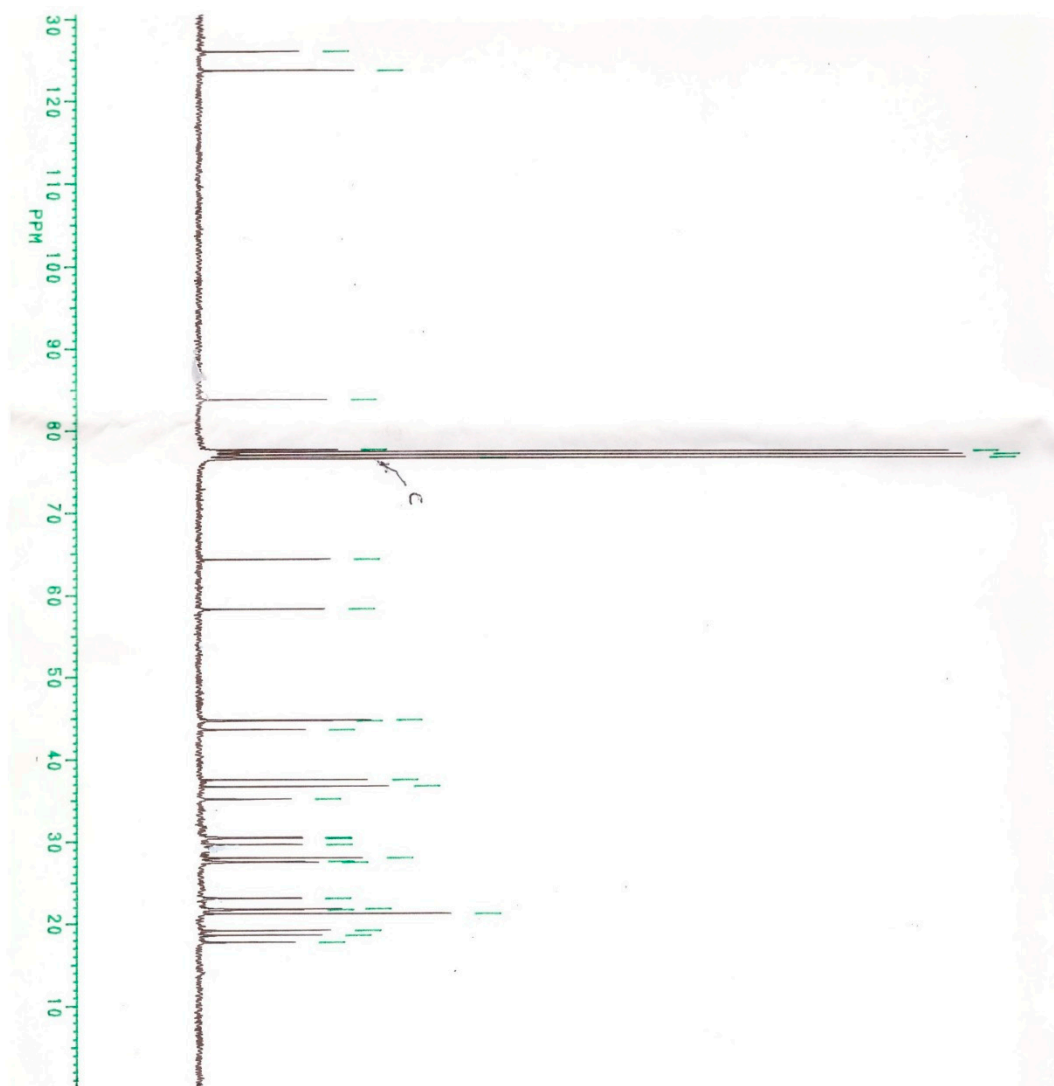

S12B

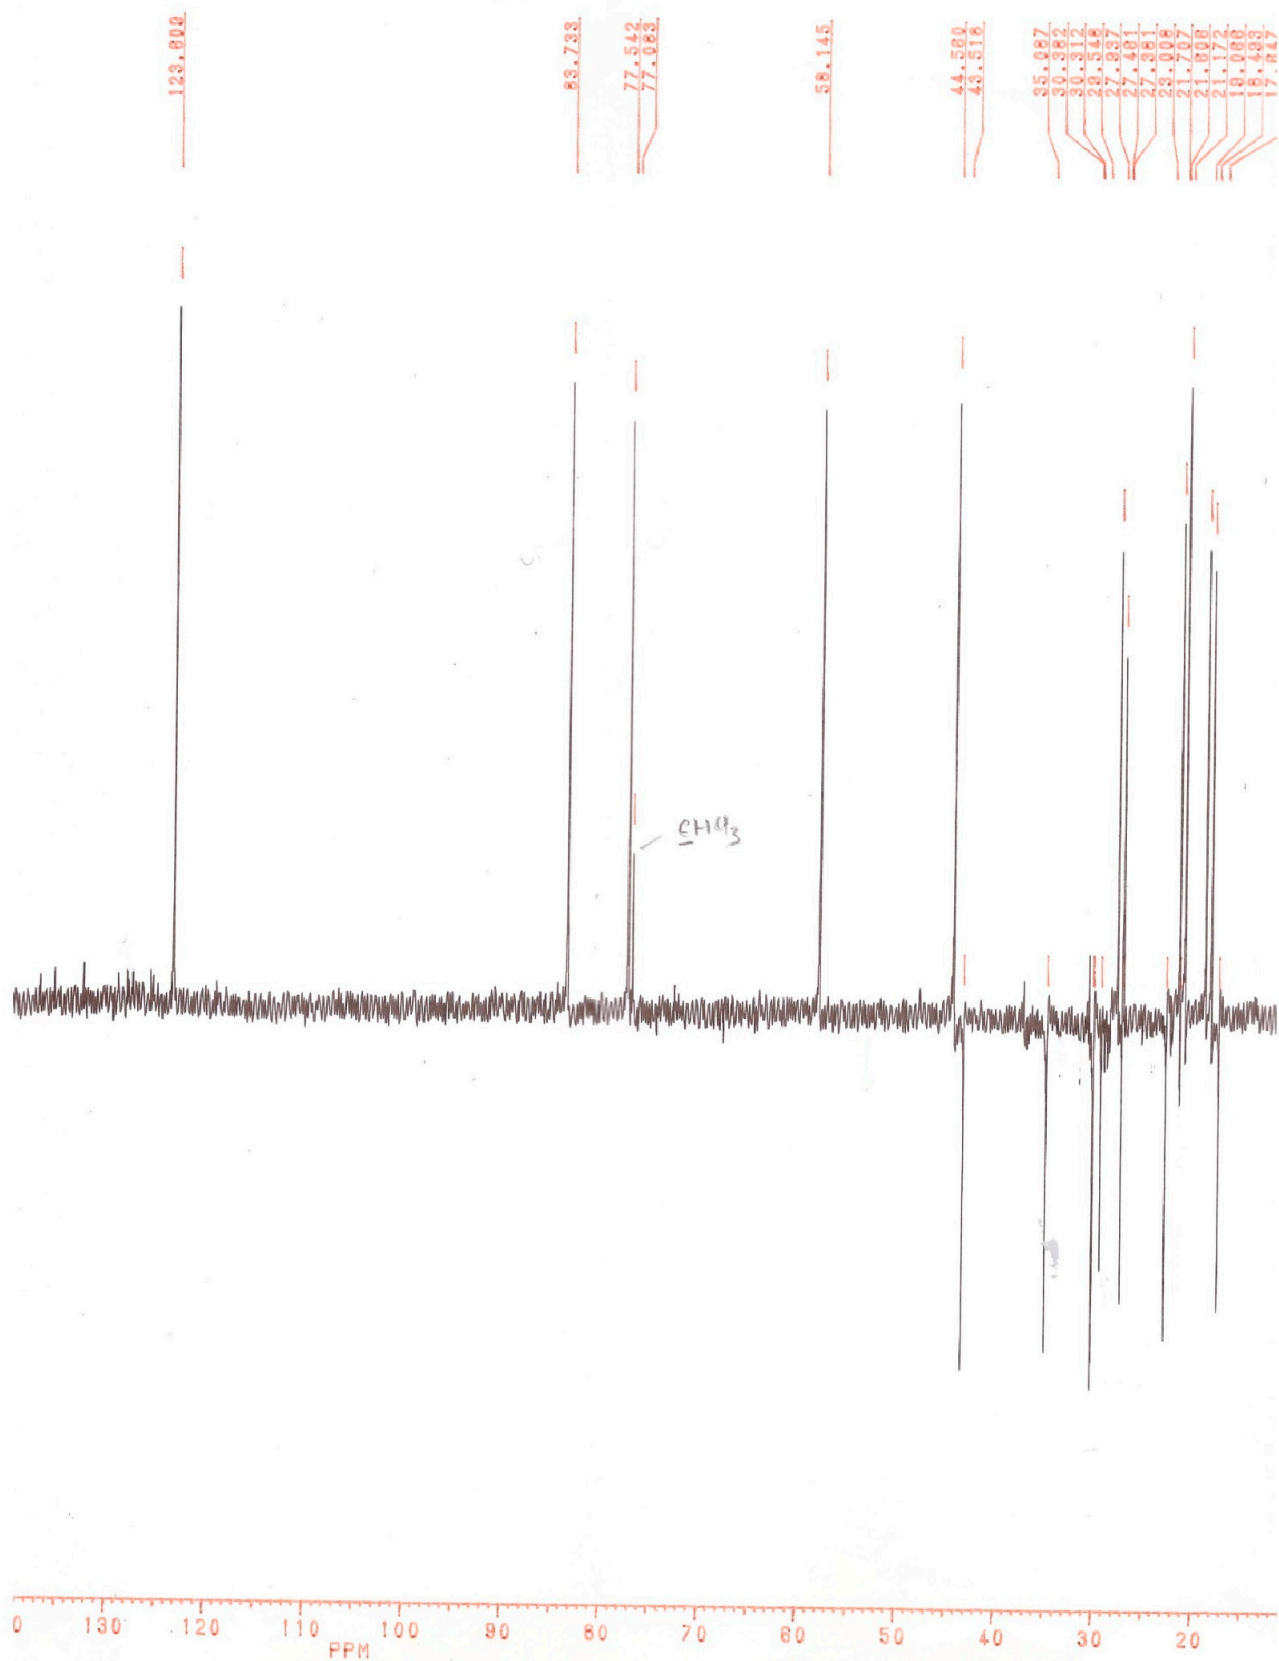

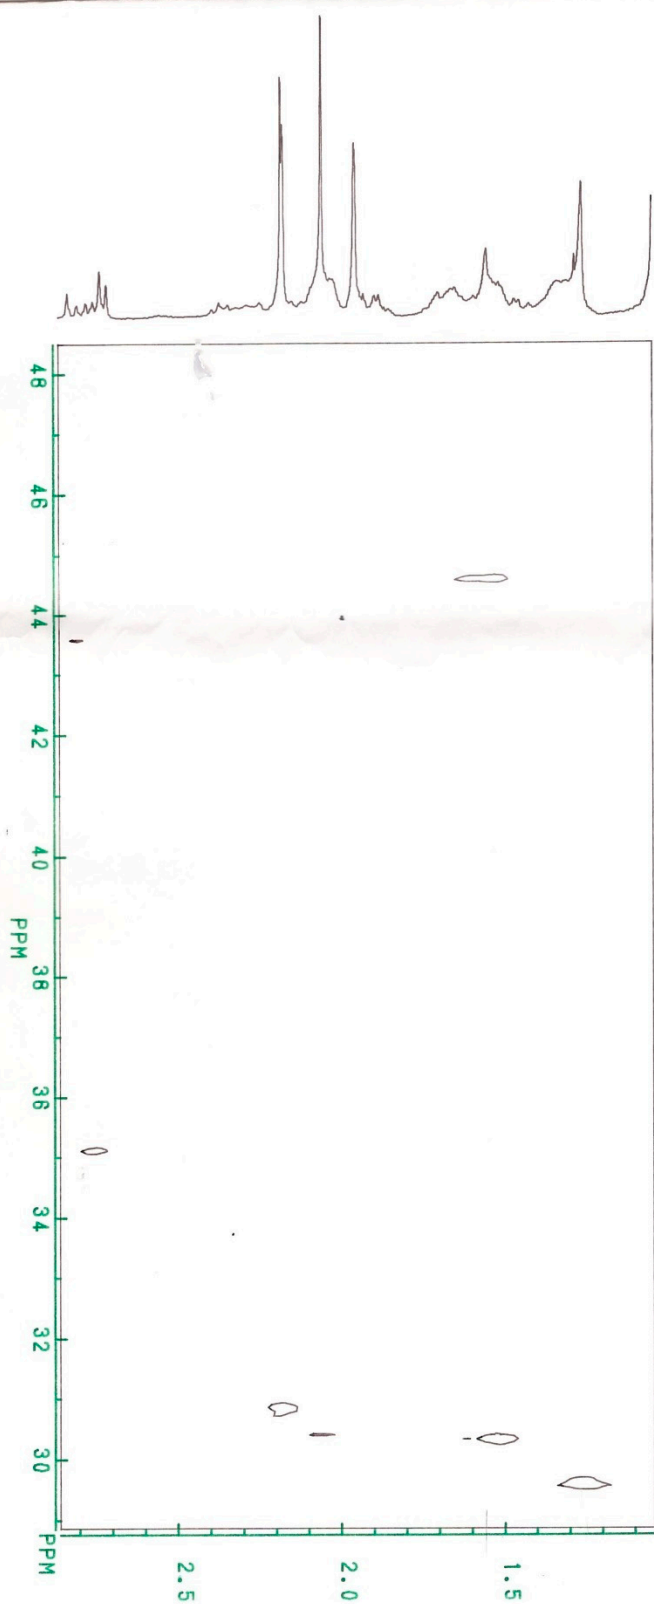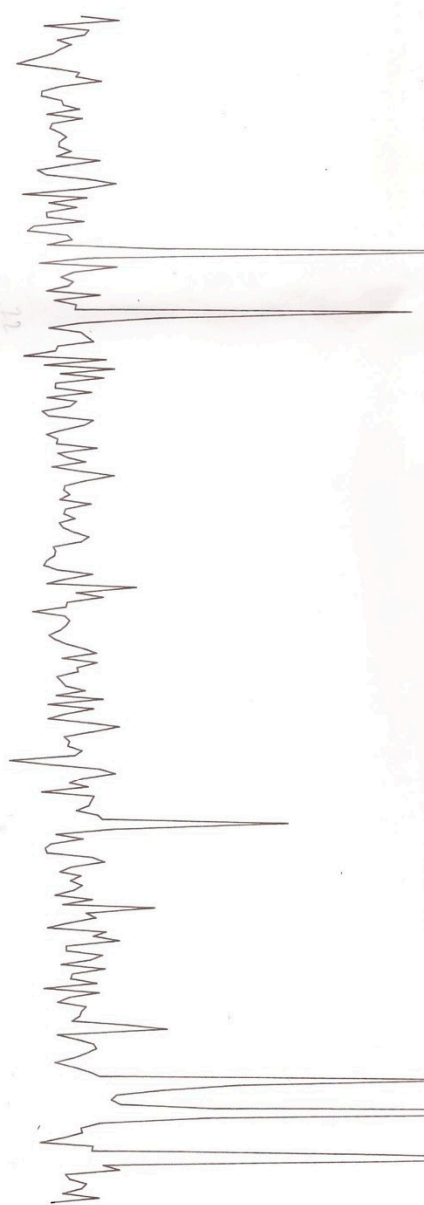

S14A

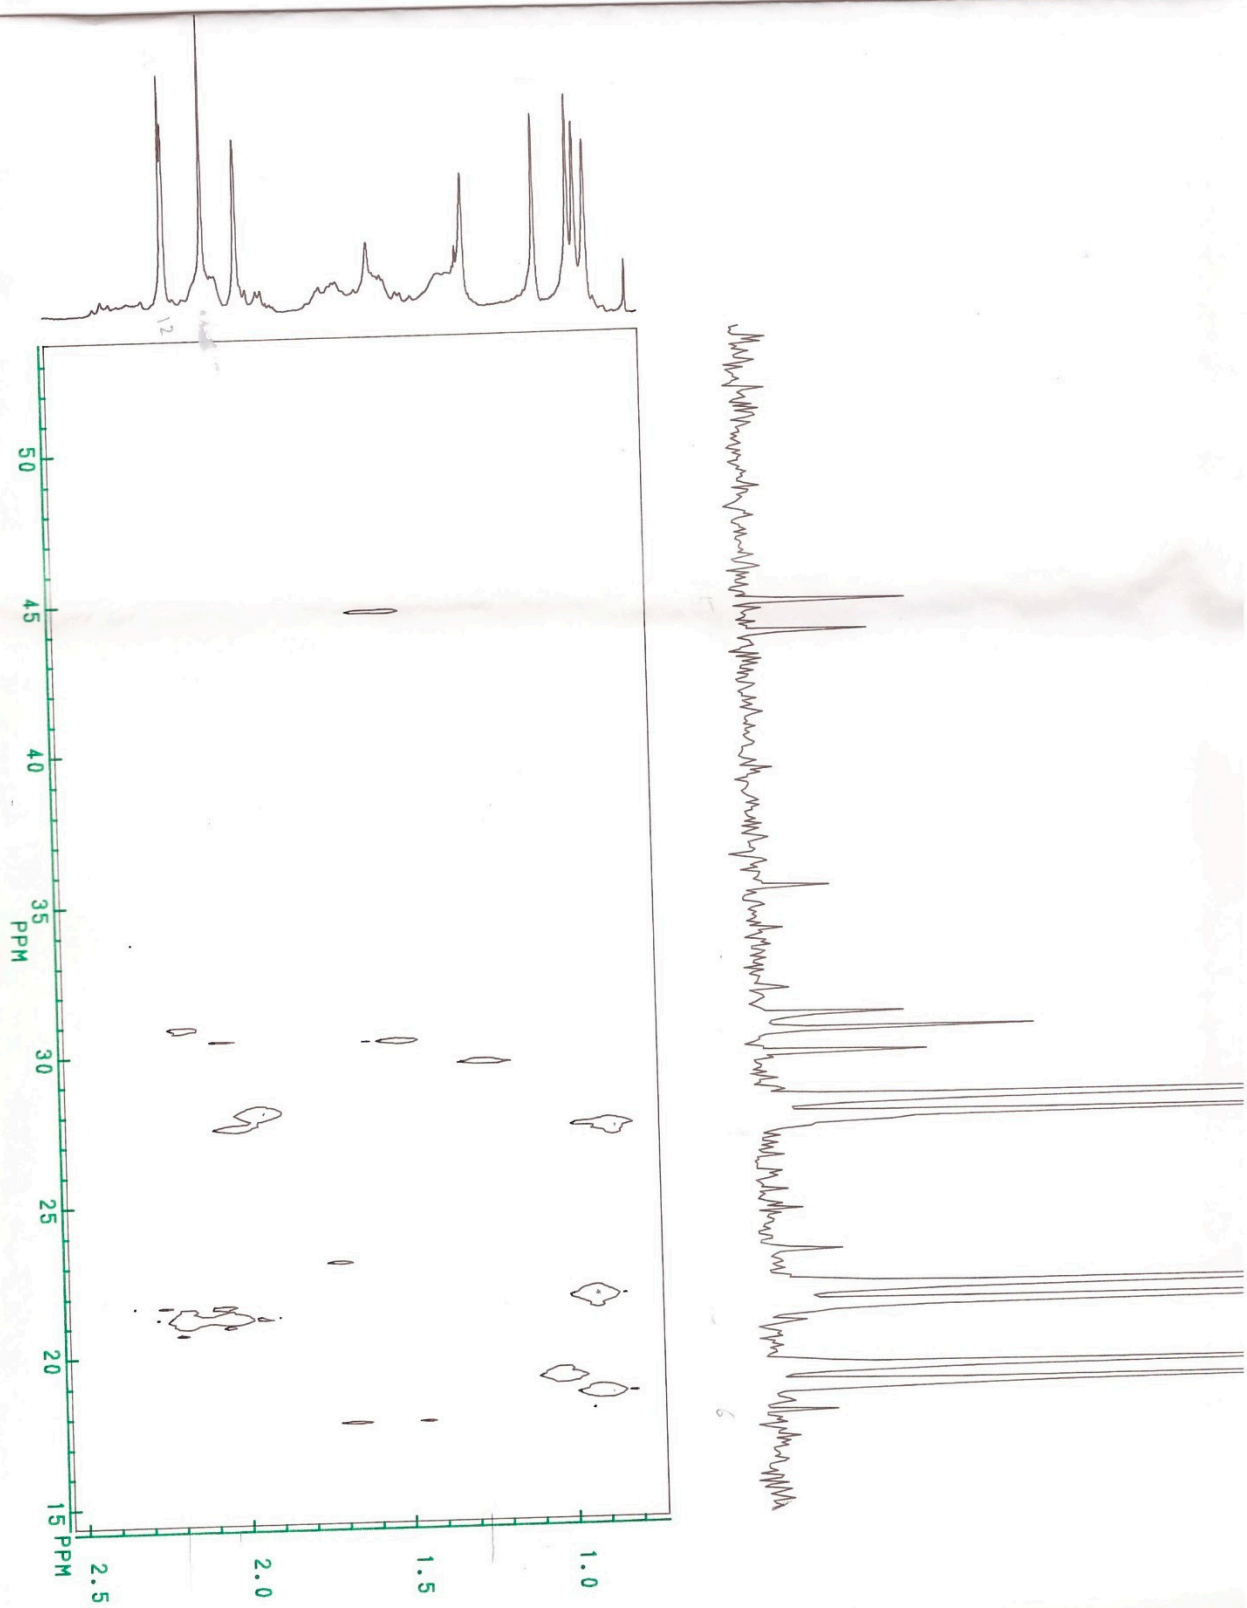

S14B

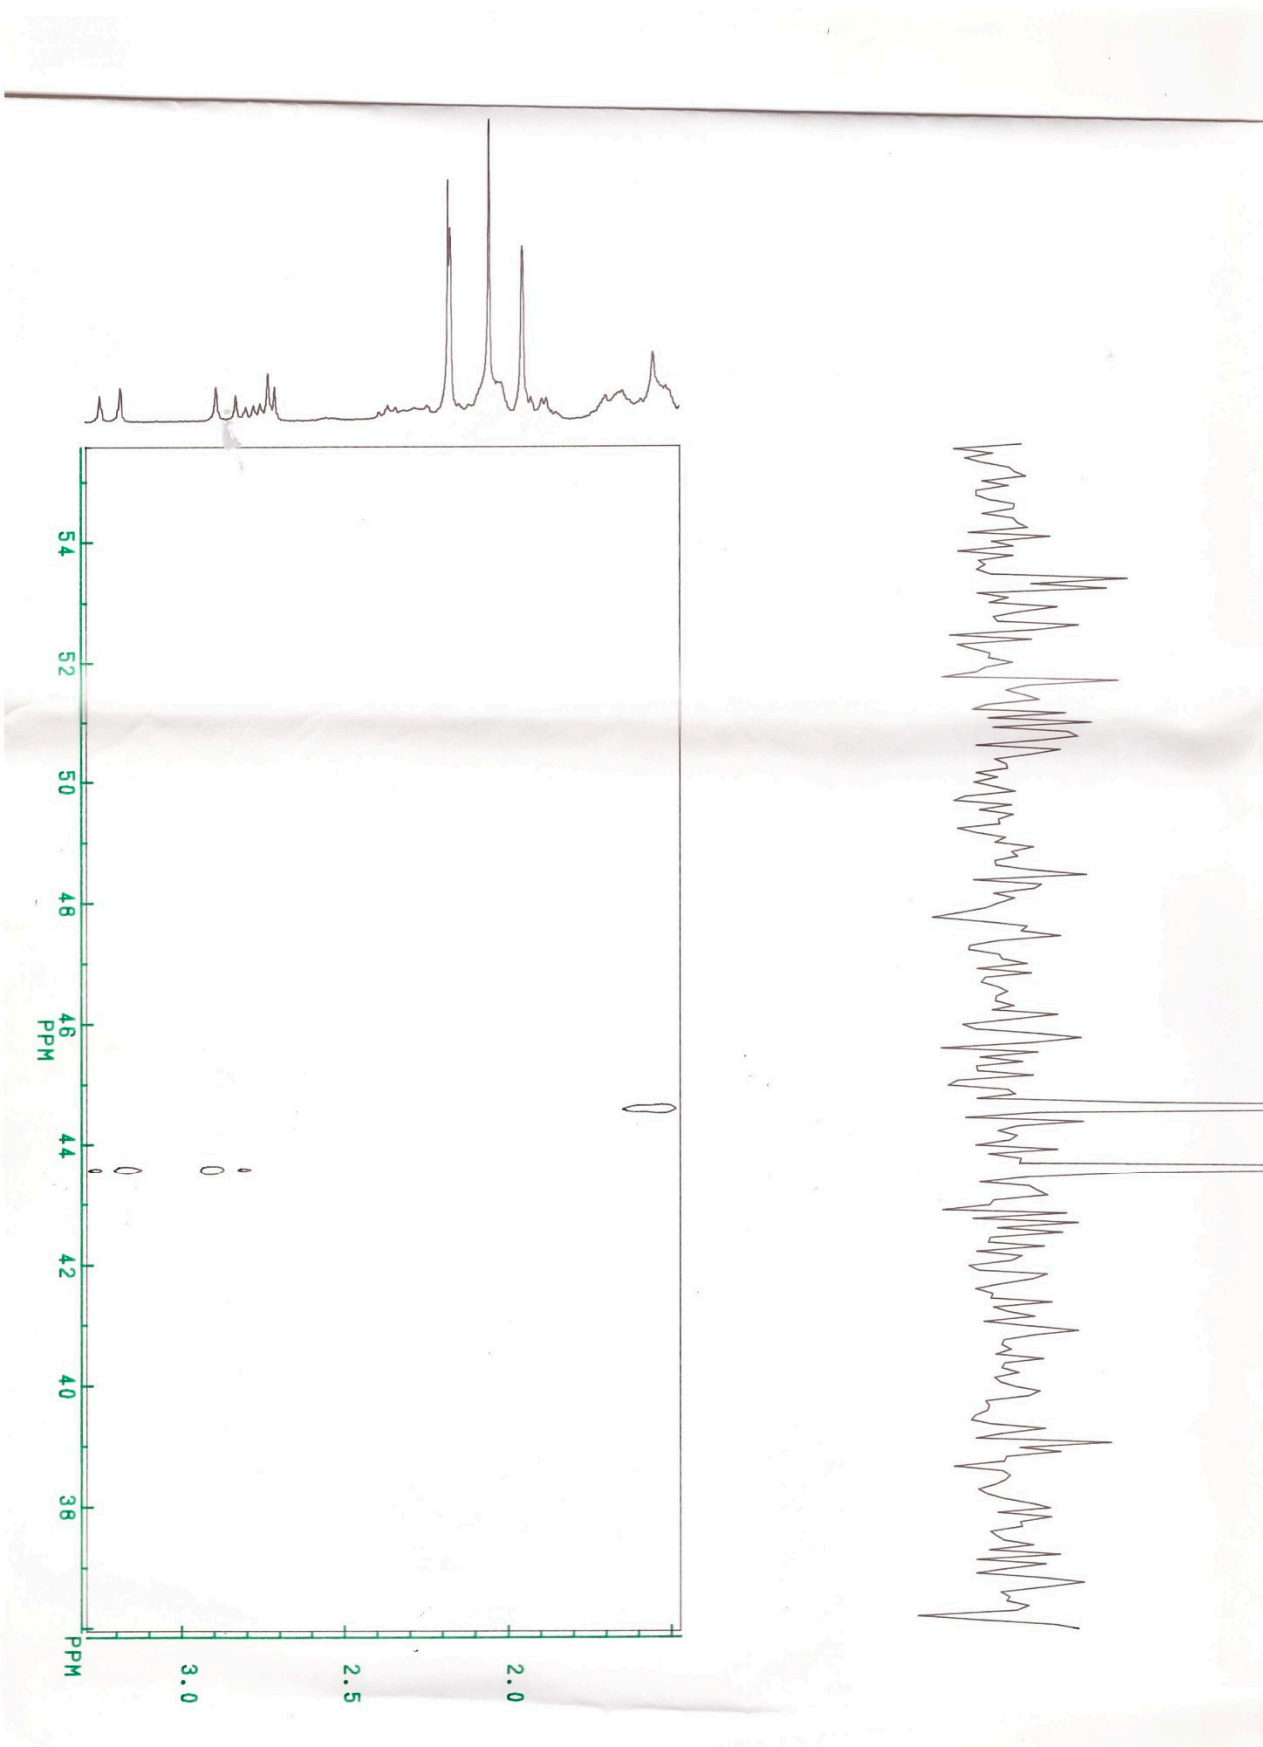

S14C

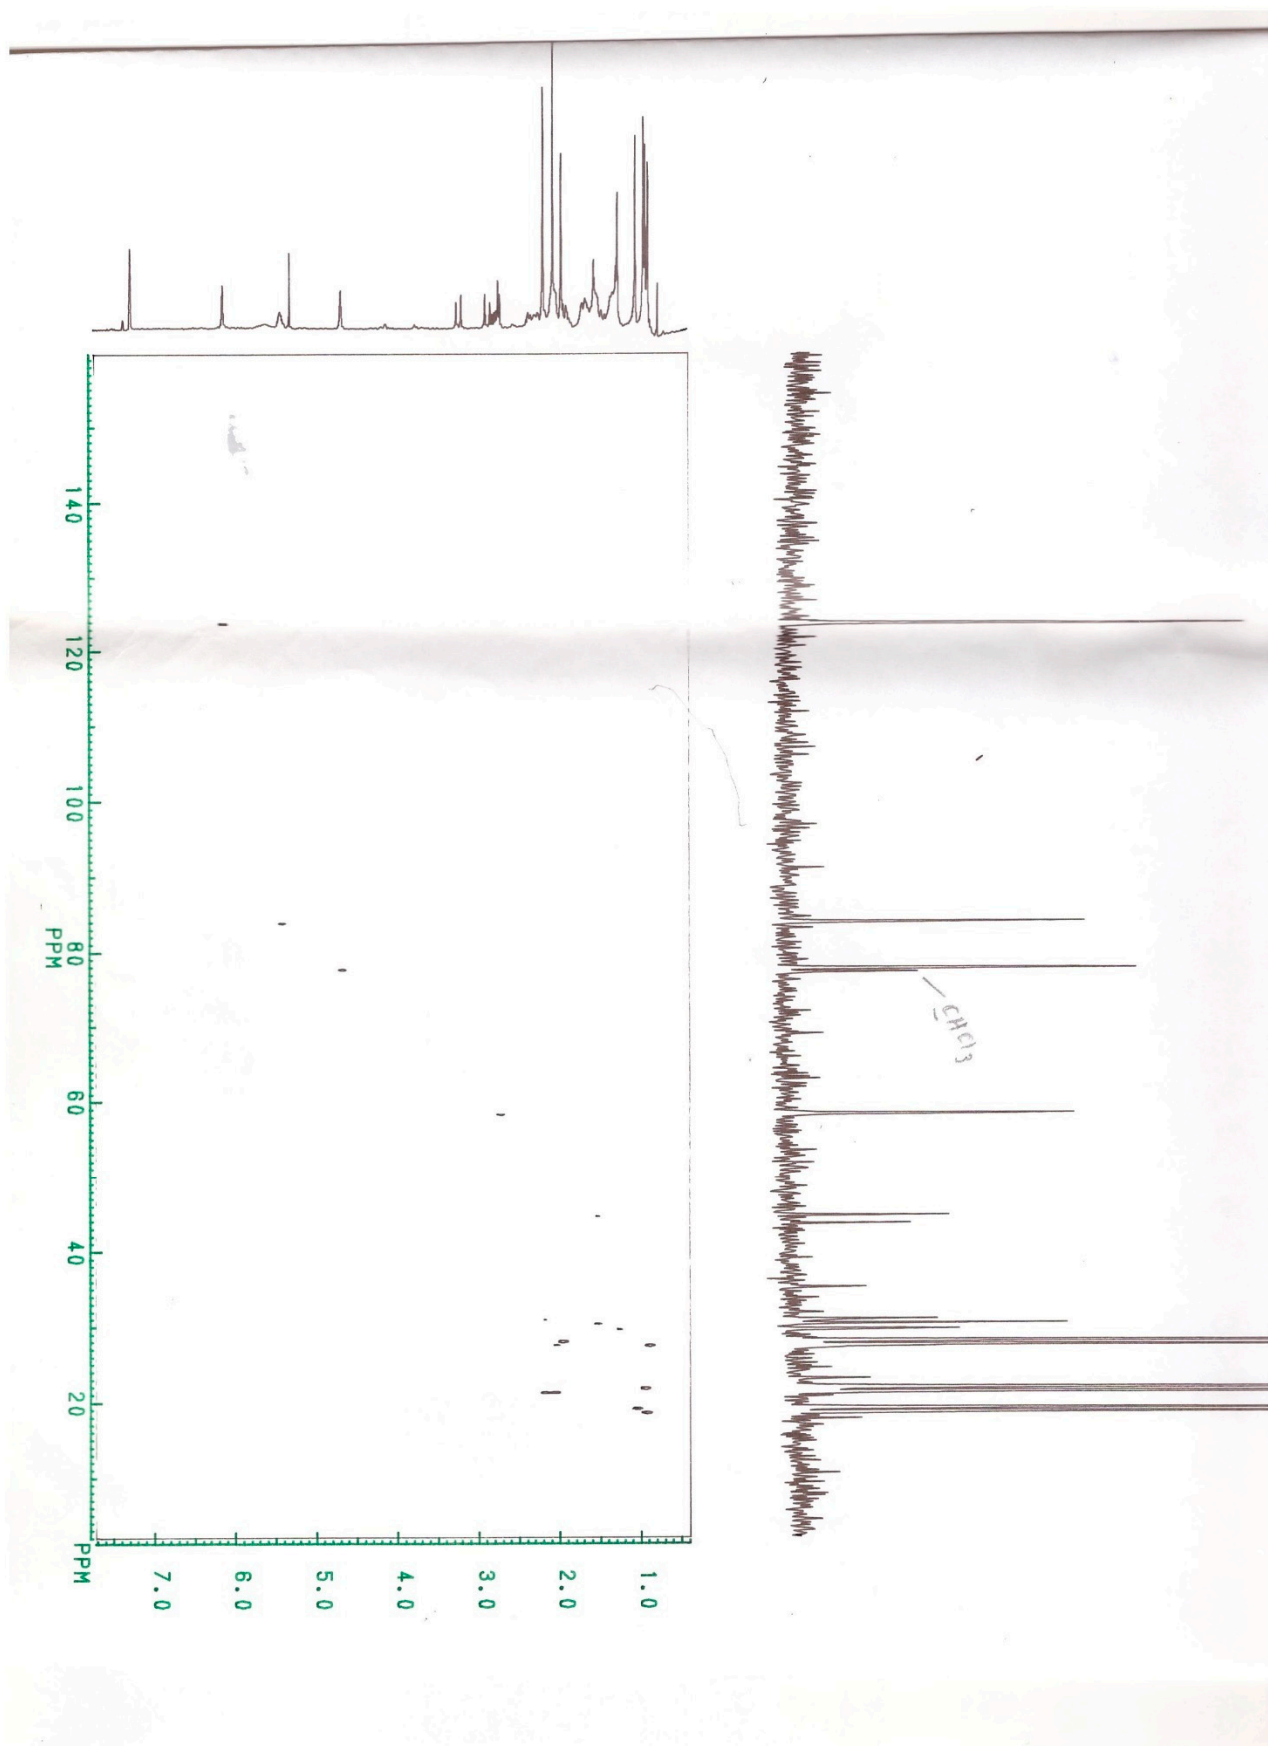

S14D



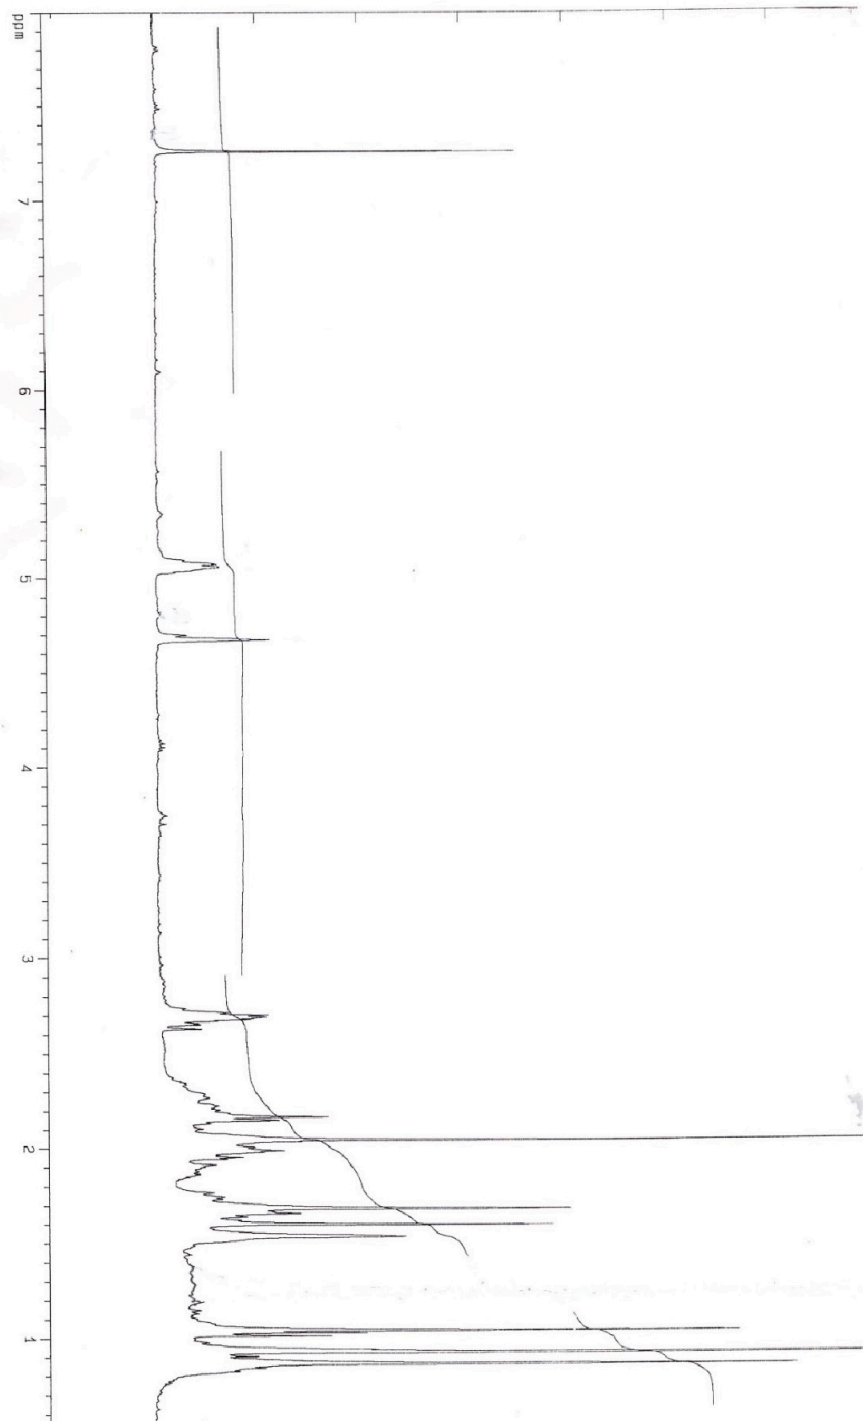

S15



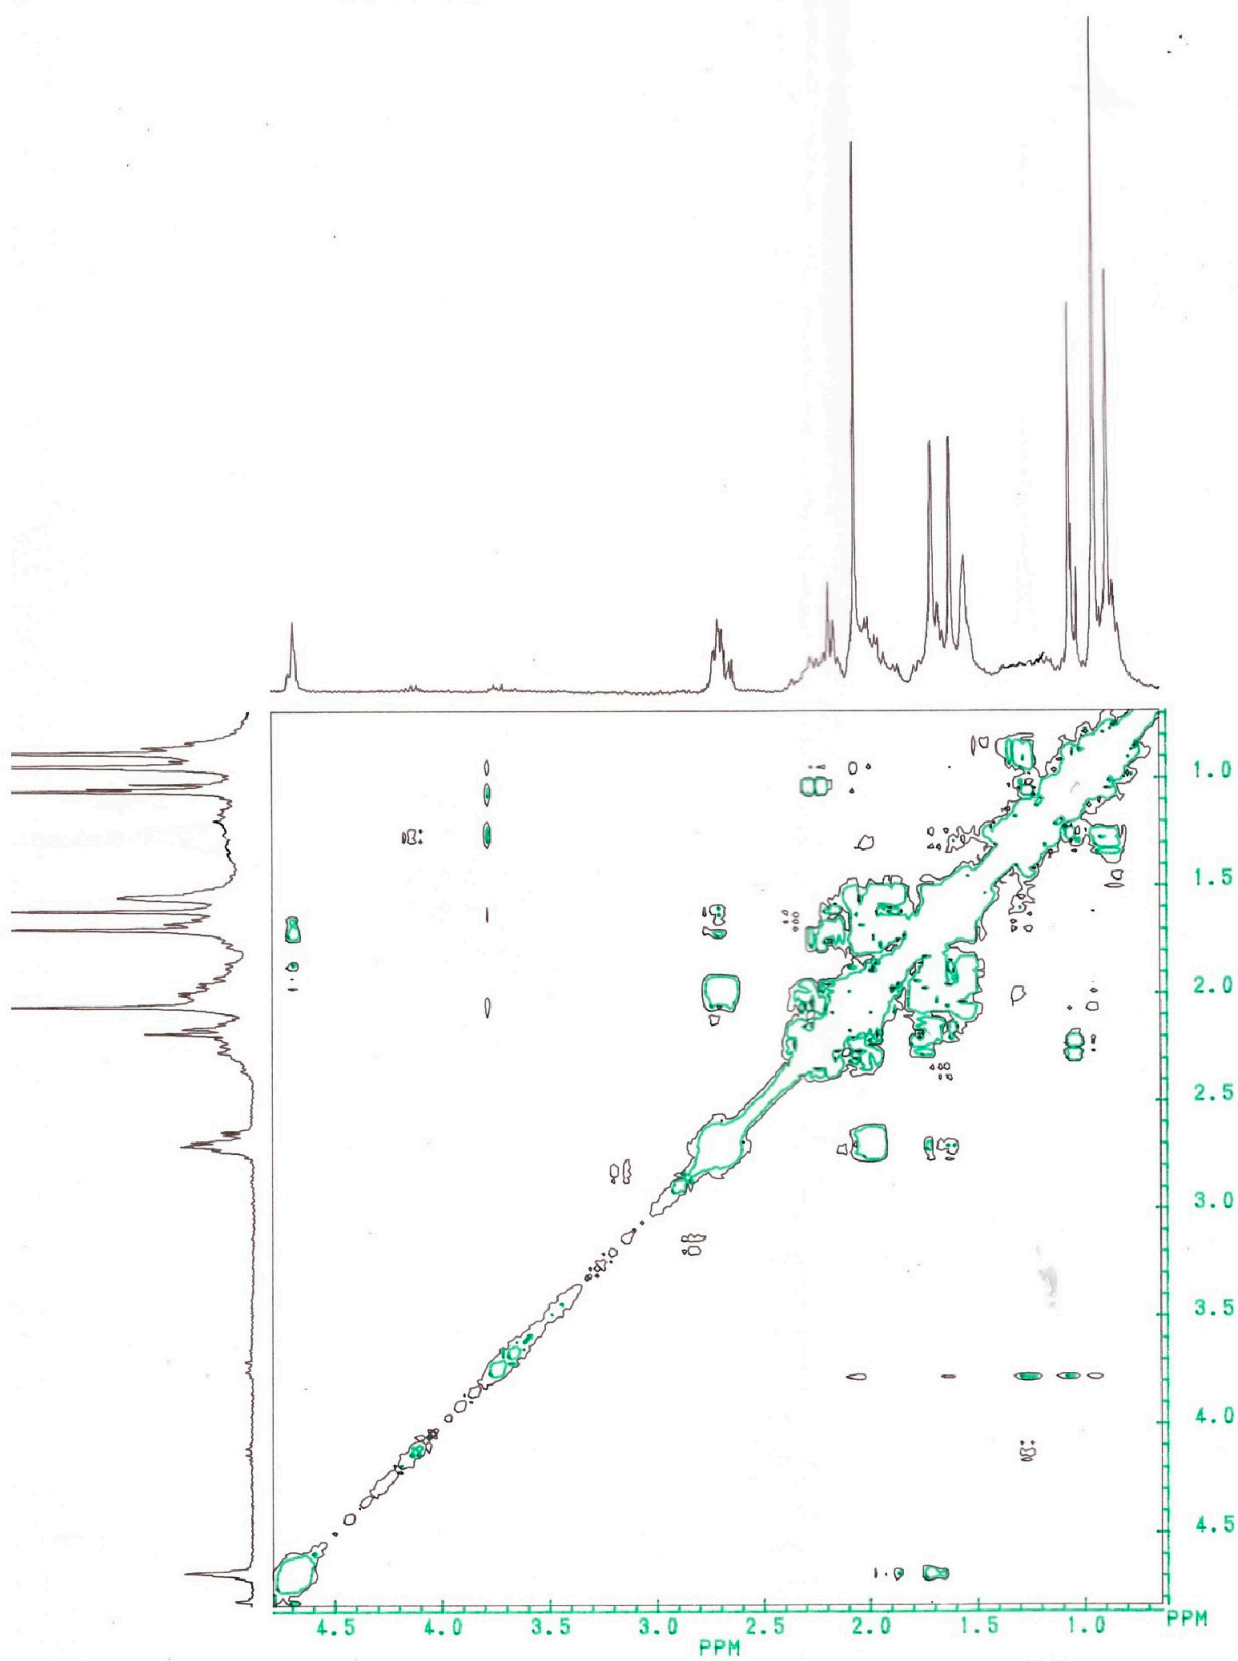

S16B

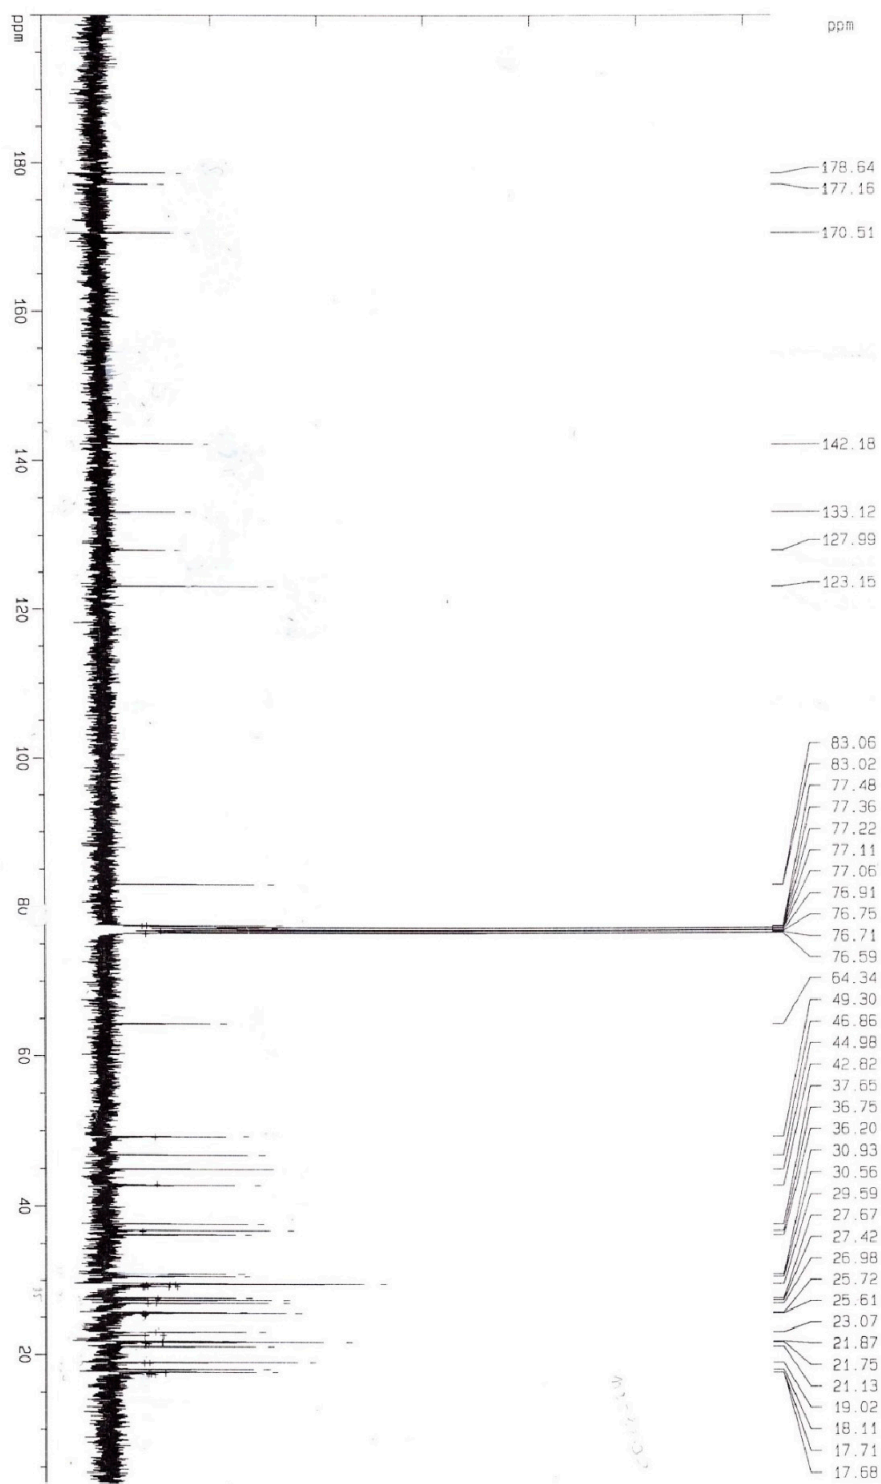

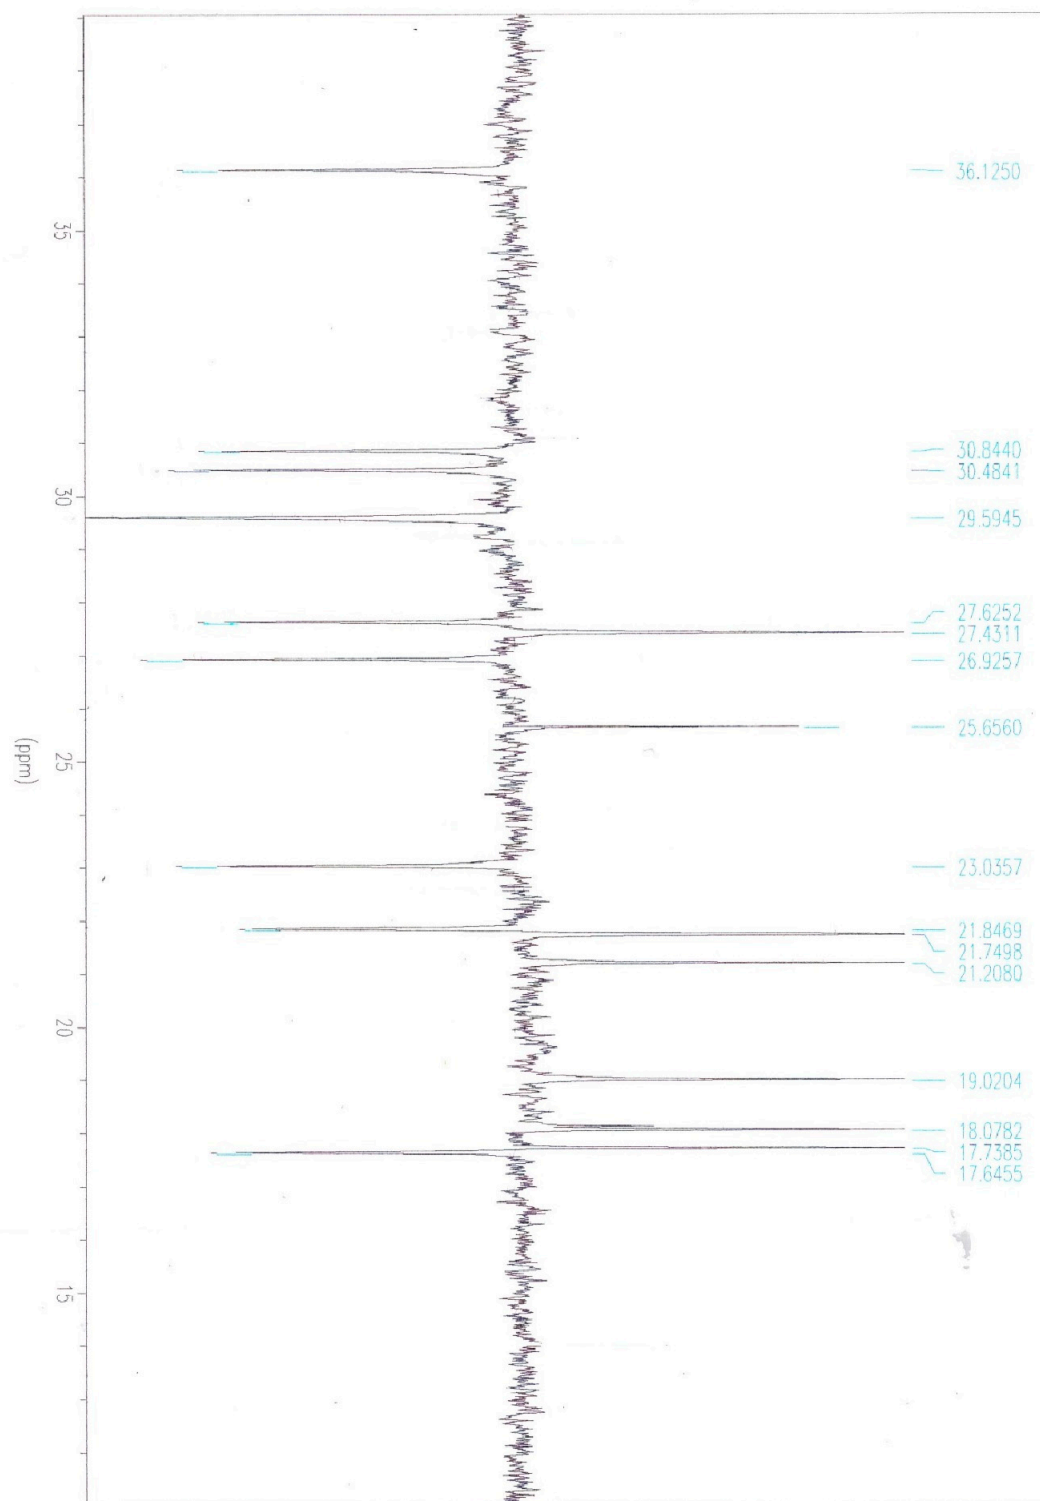

S18A

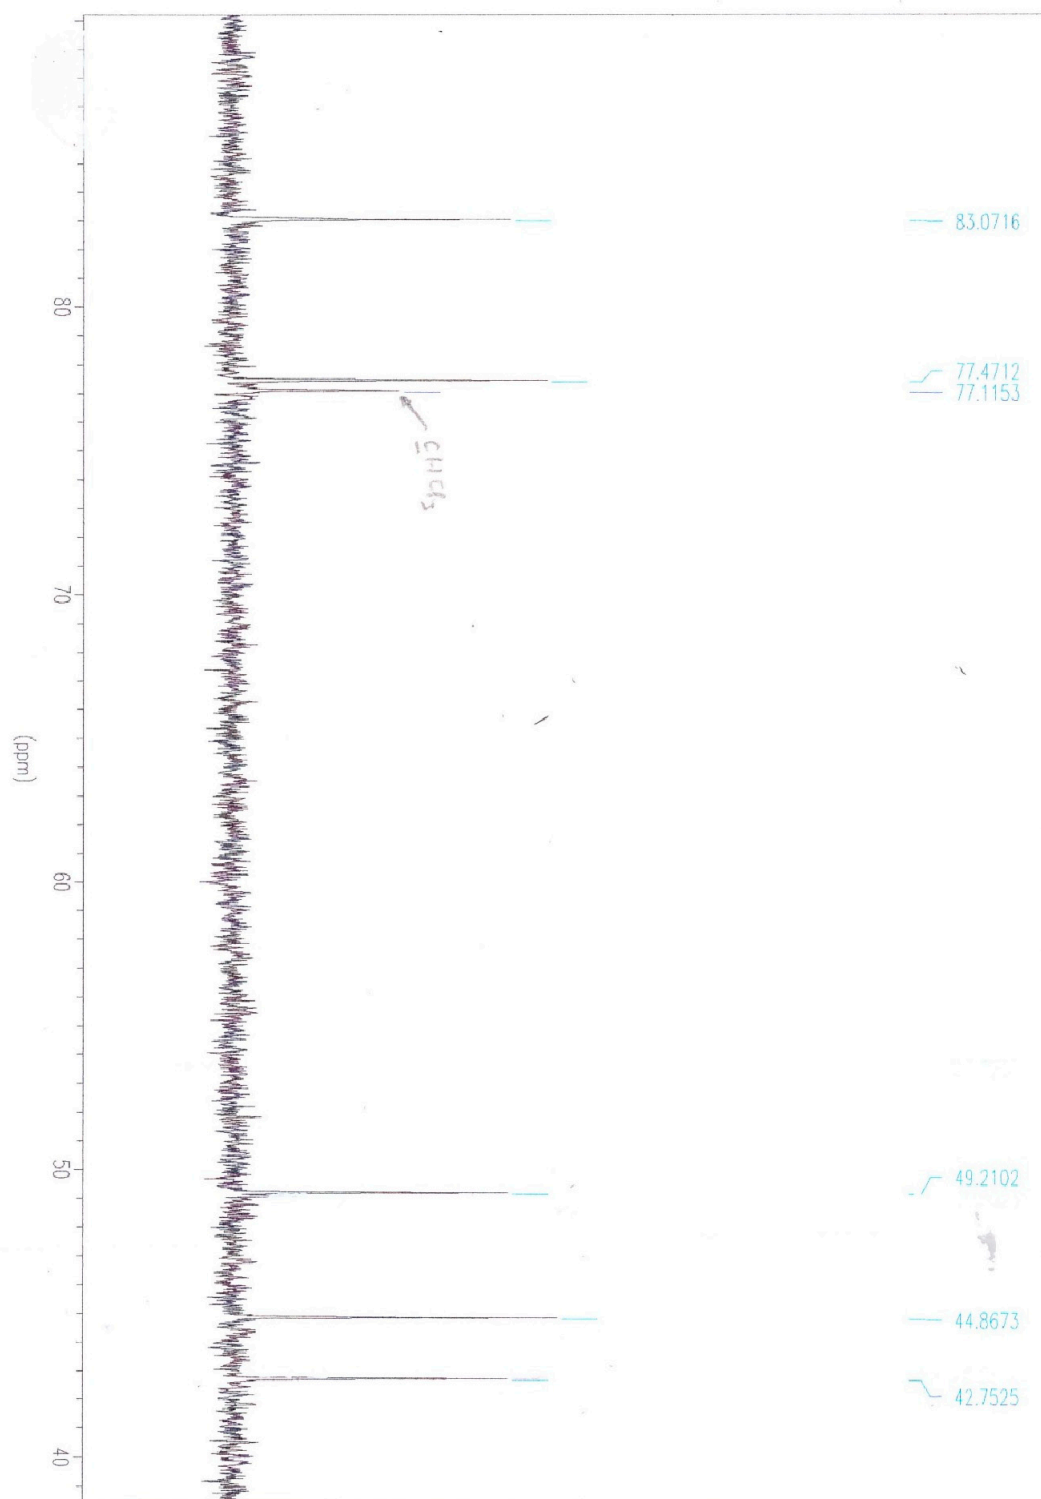

S18B

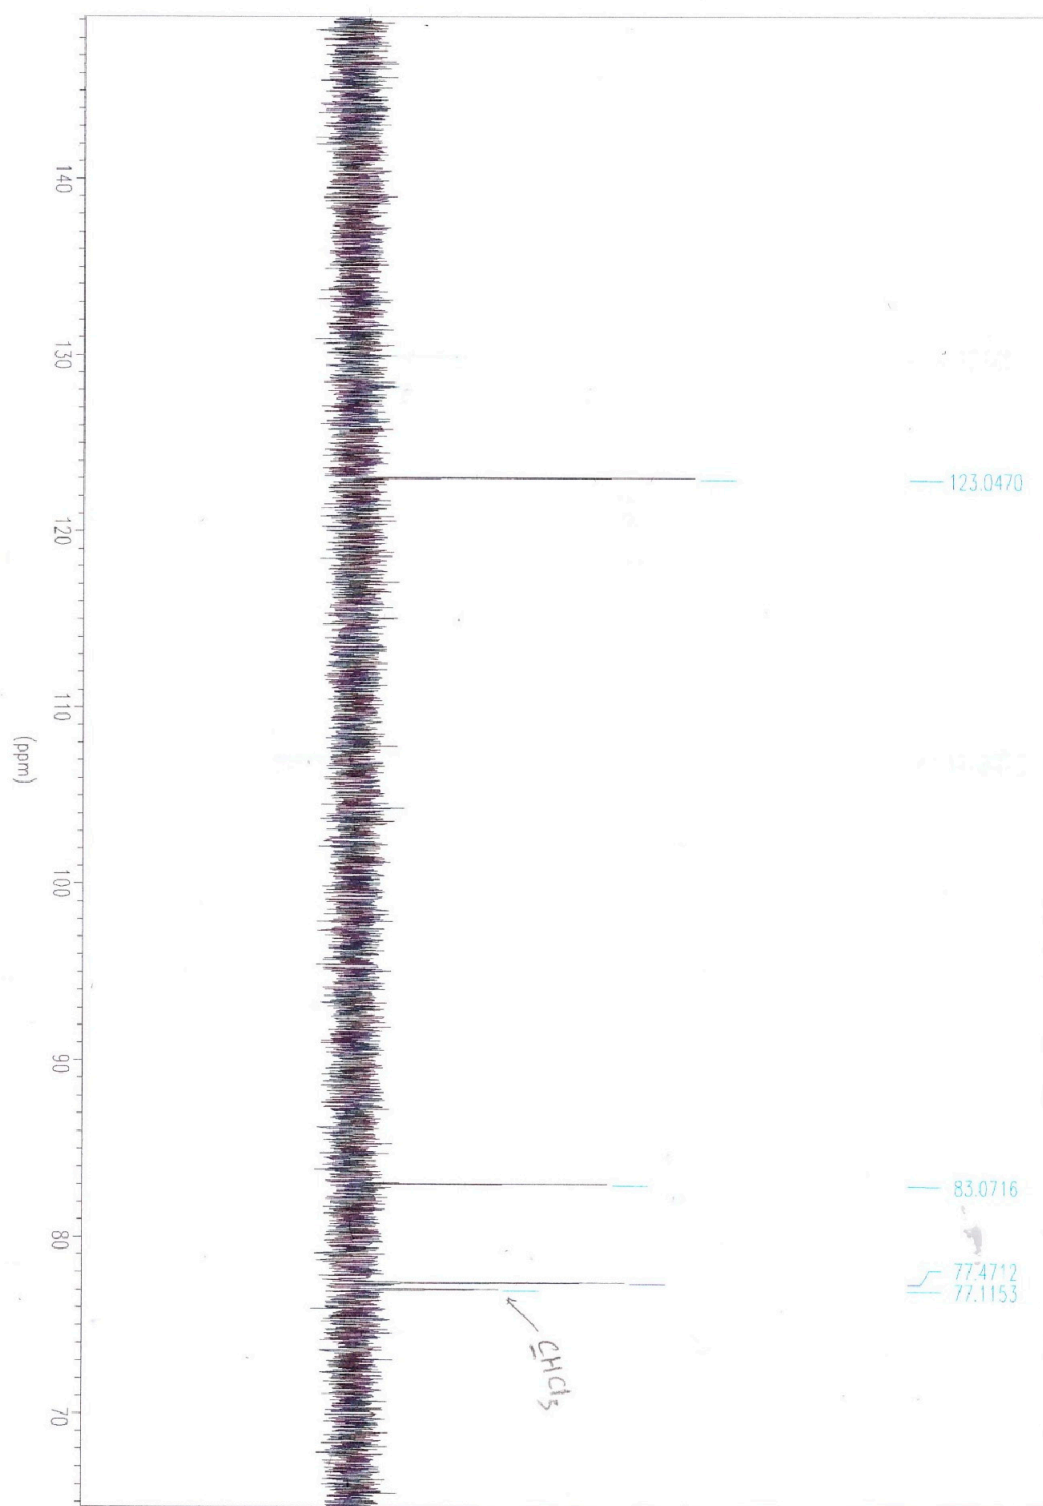

S18C

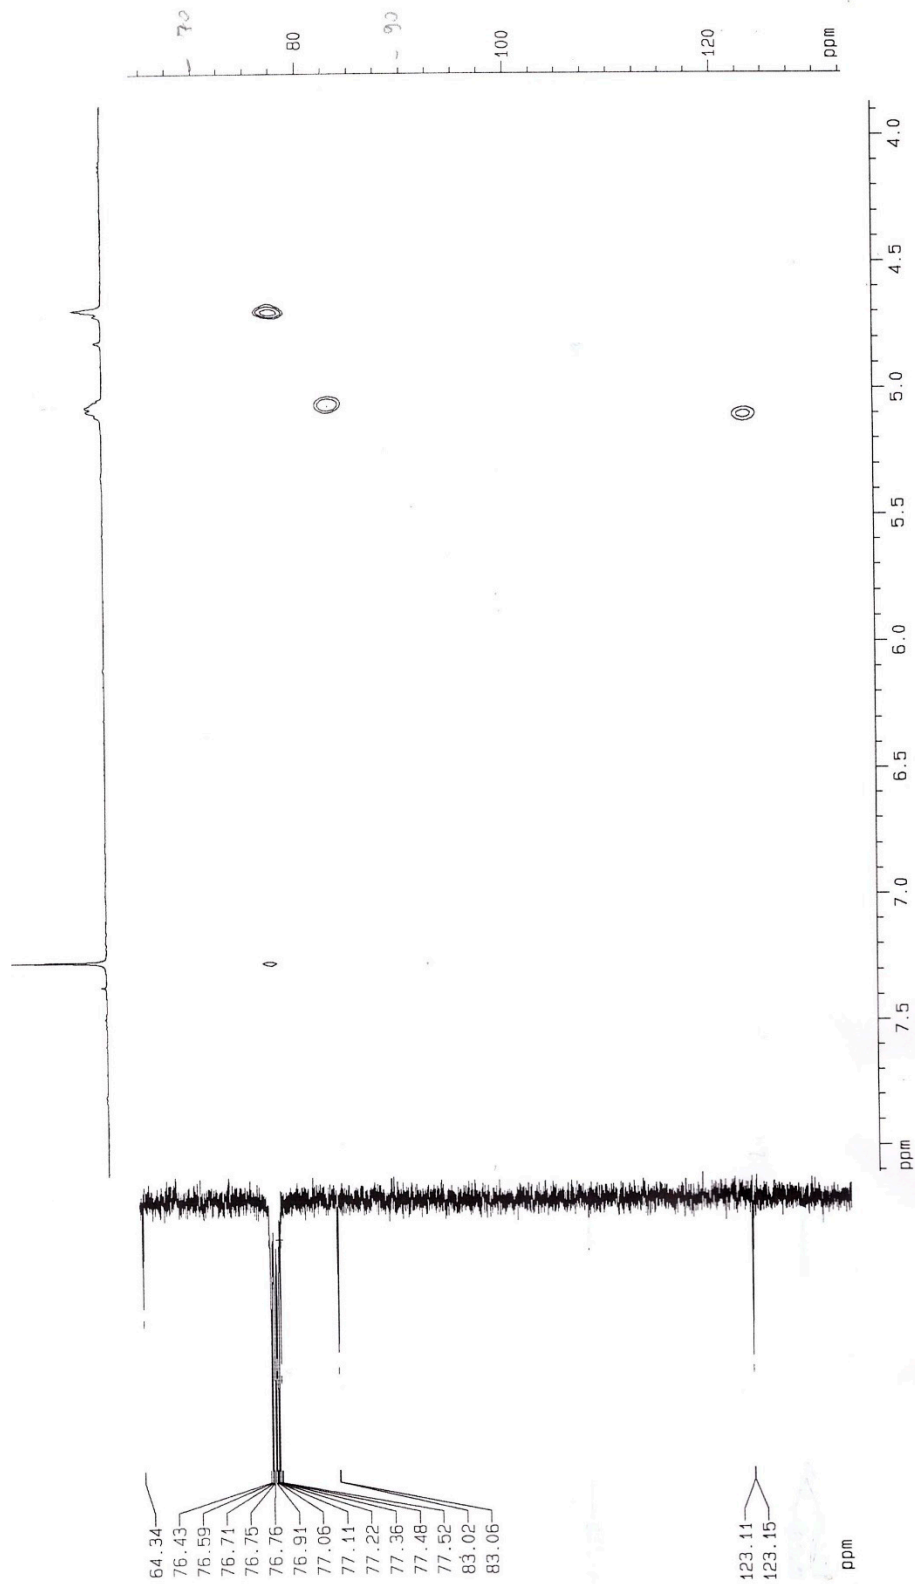

S19A



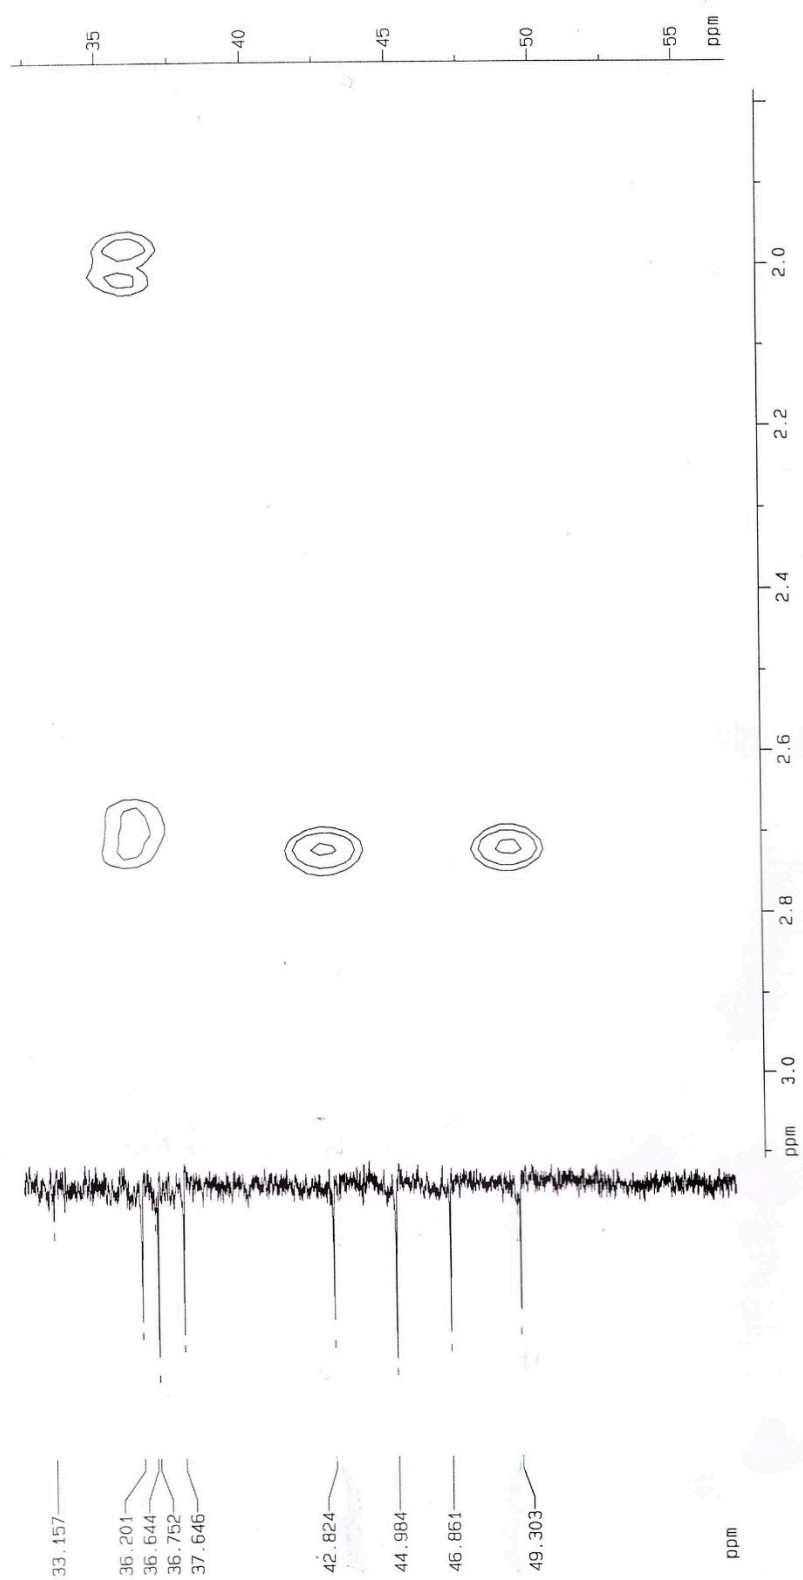

S19B

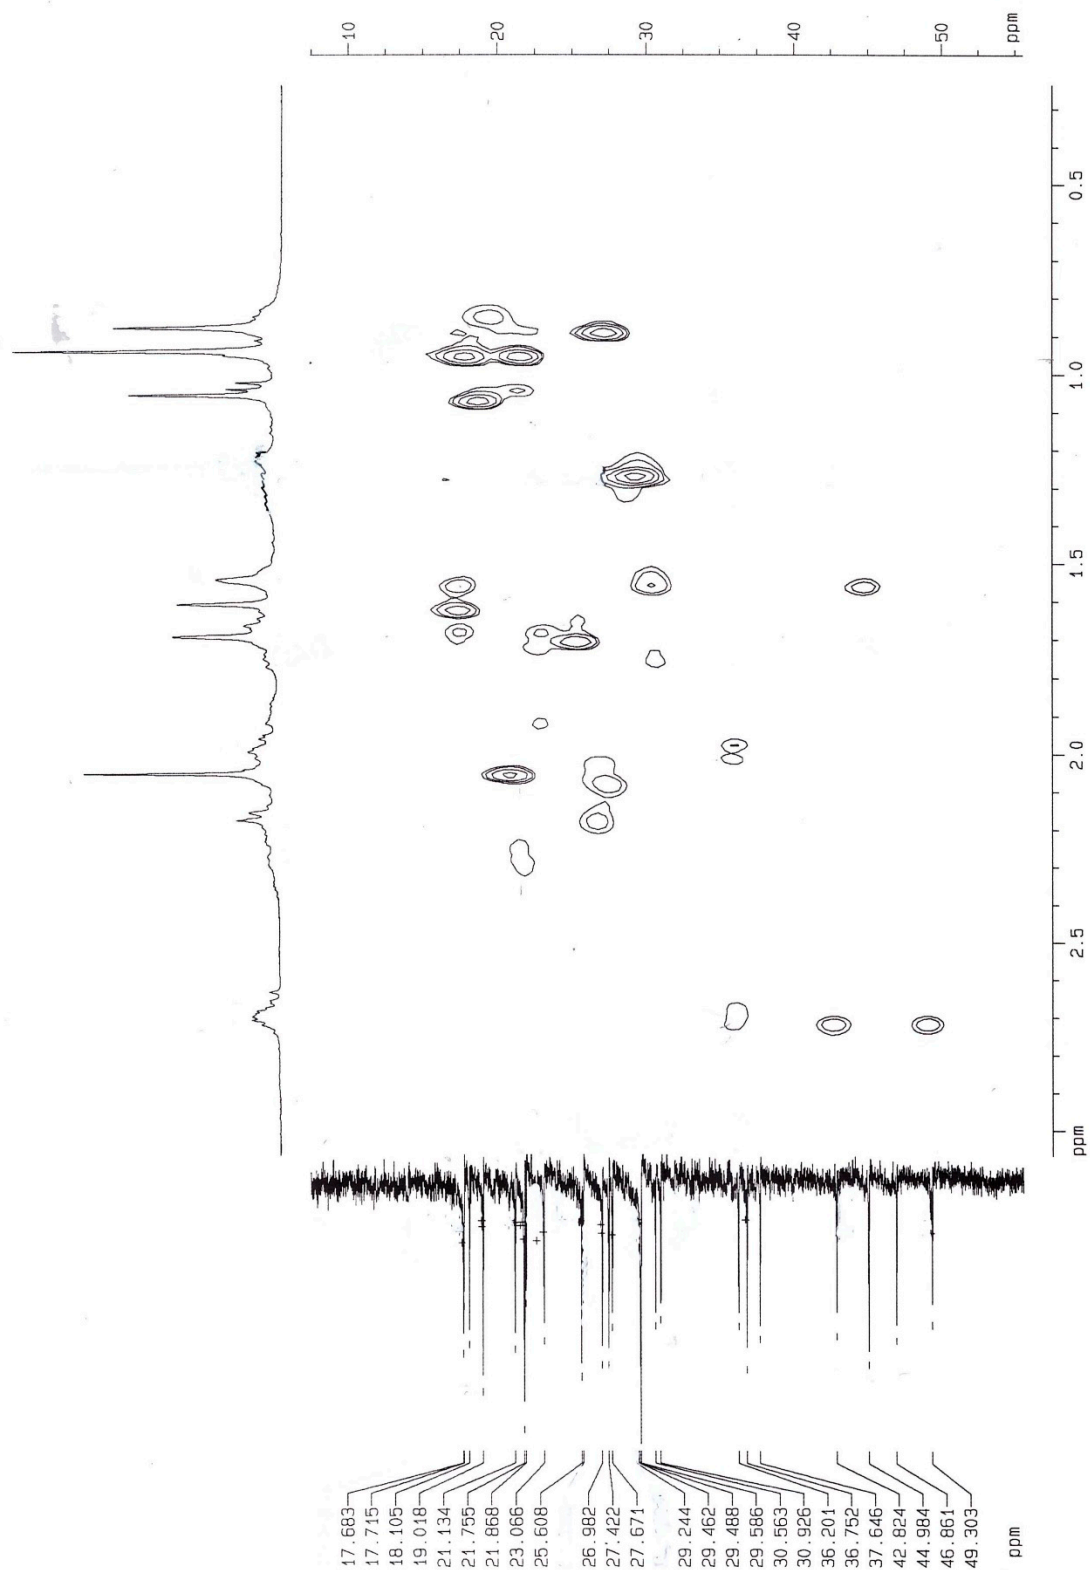

S19C
